# Supplementary material
Source: PubMed Central journal article supplement (PMC8930560)

# EpCAM

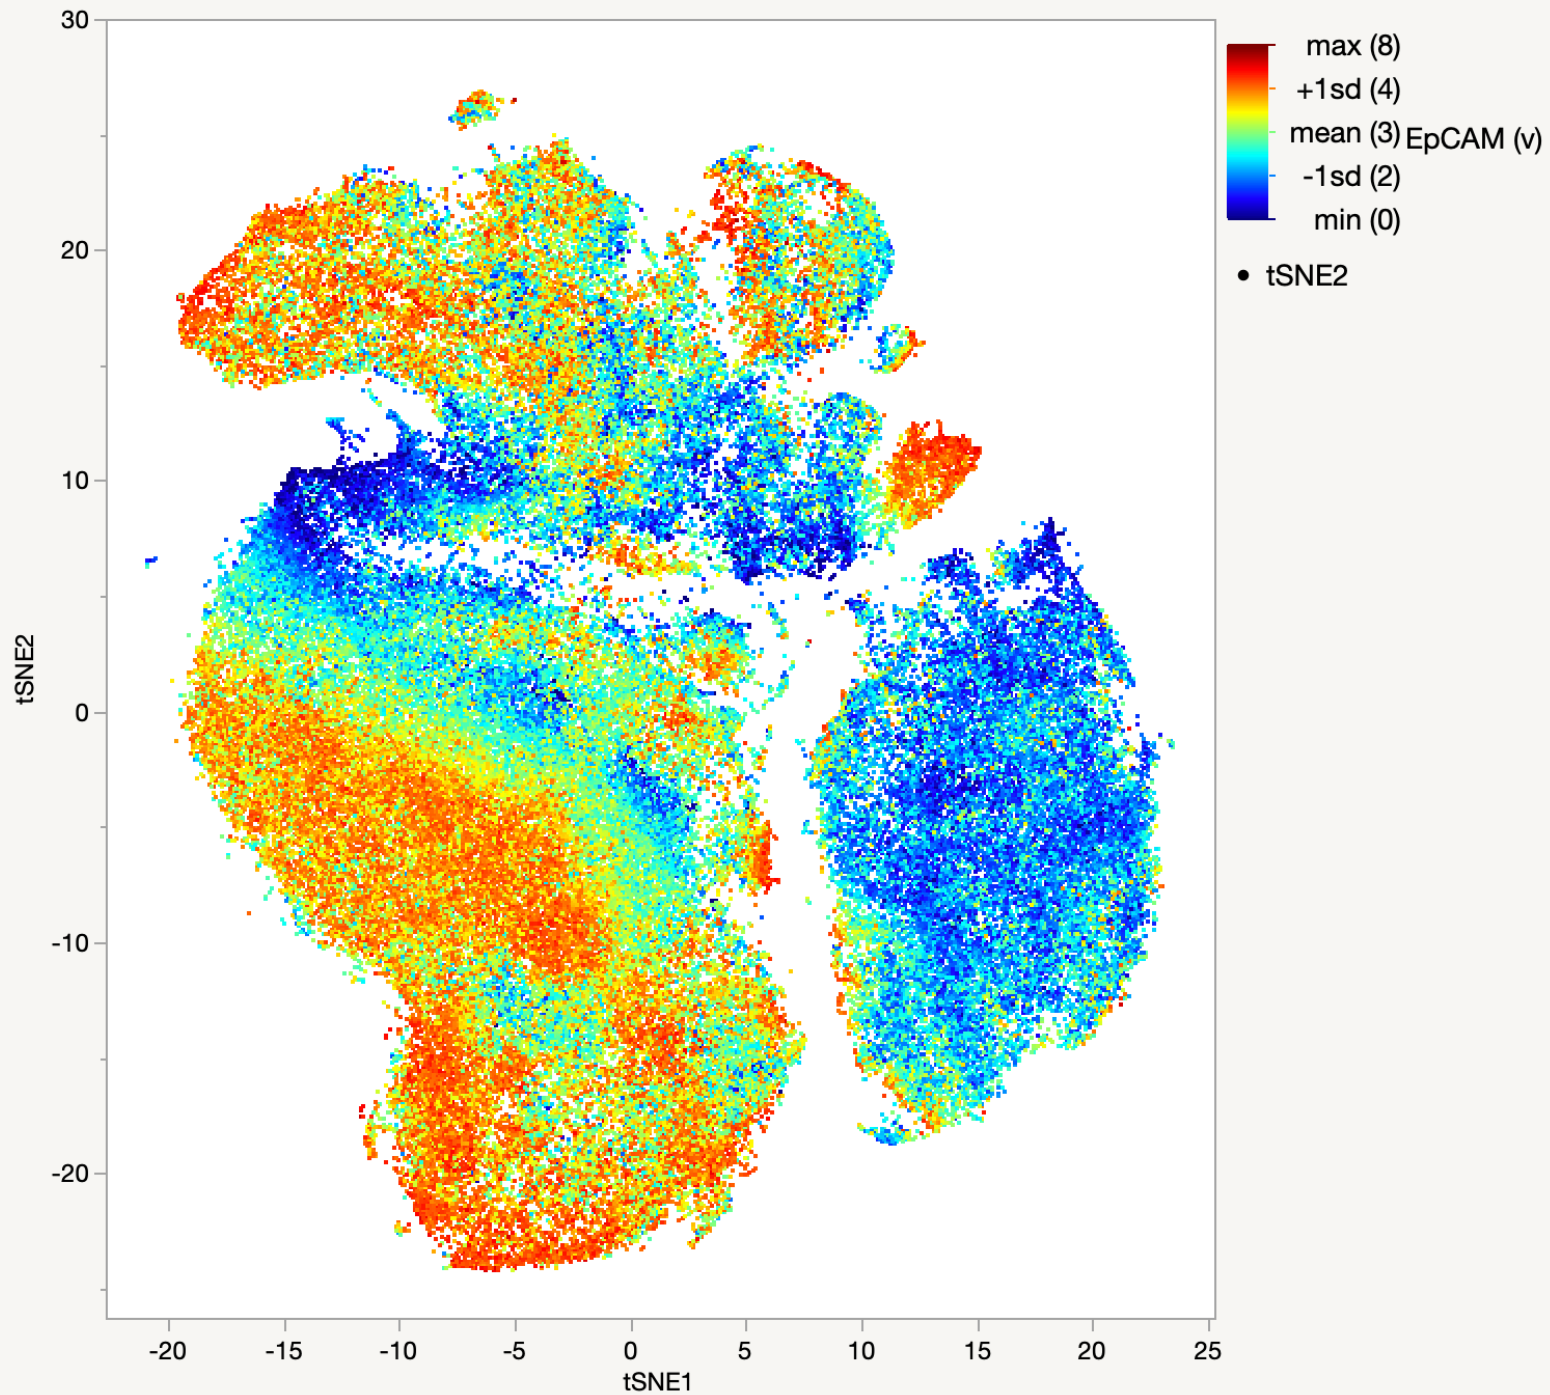

c-Met

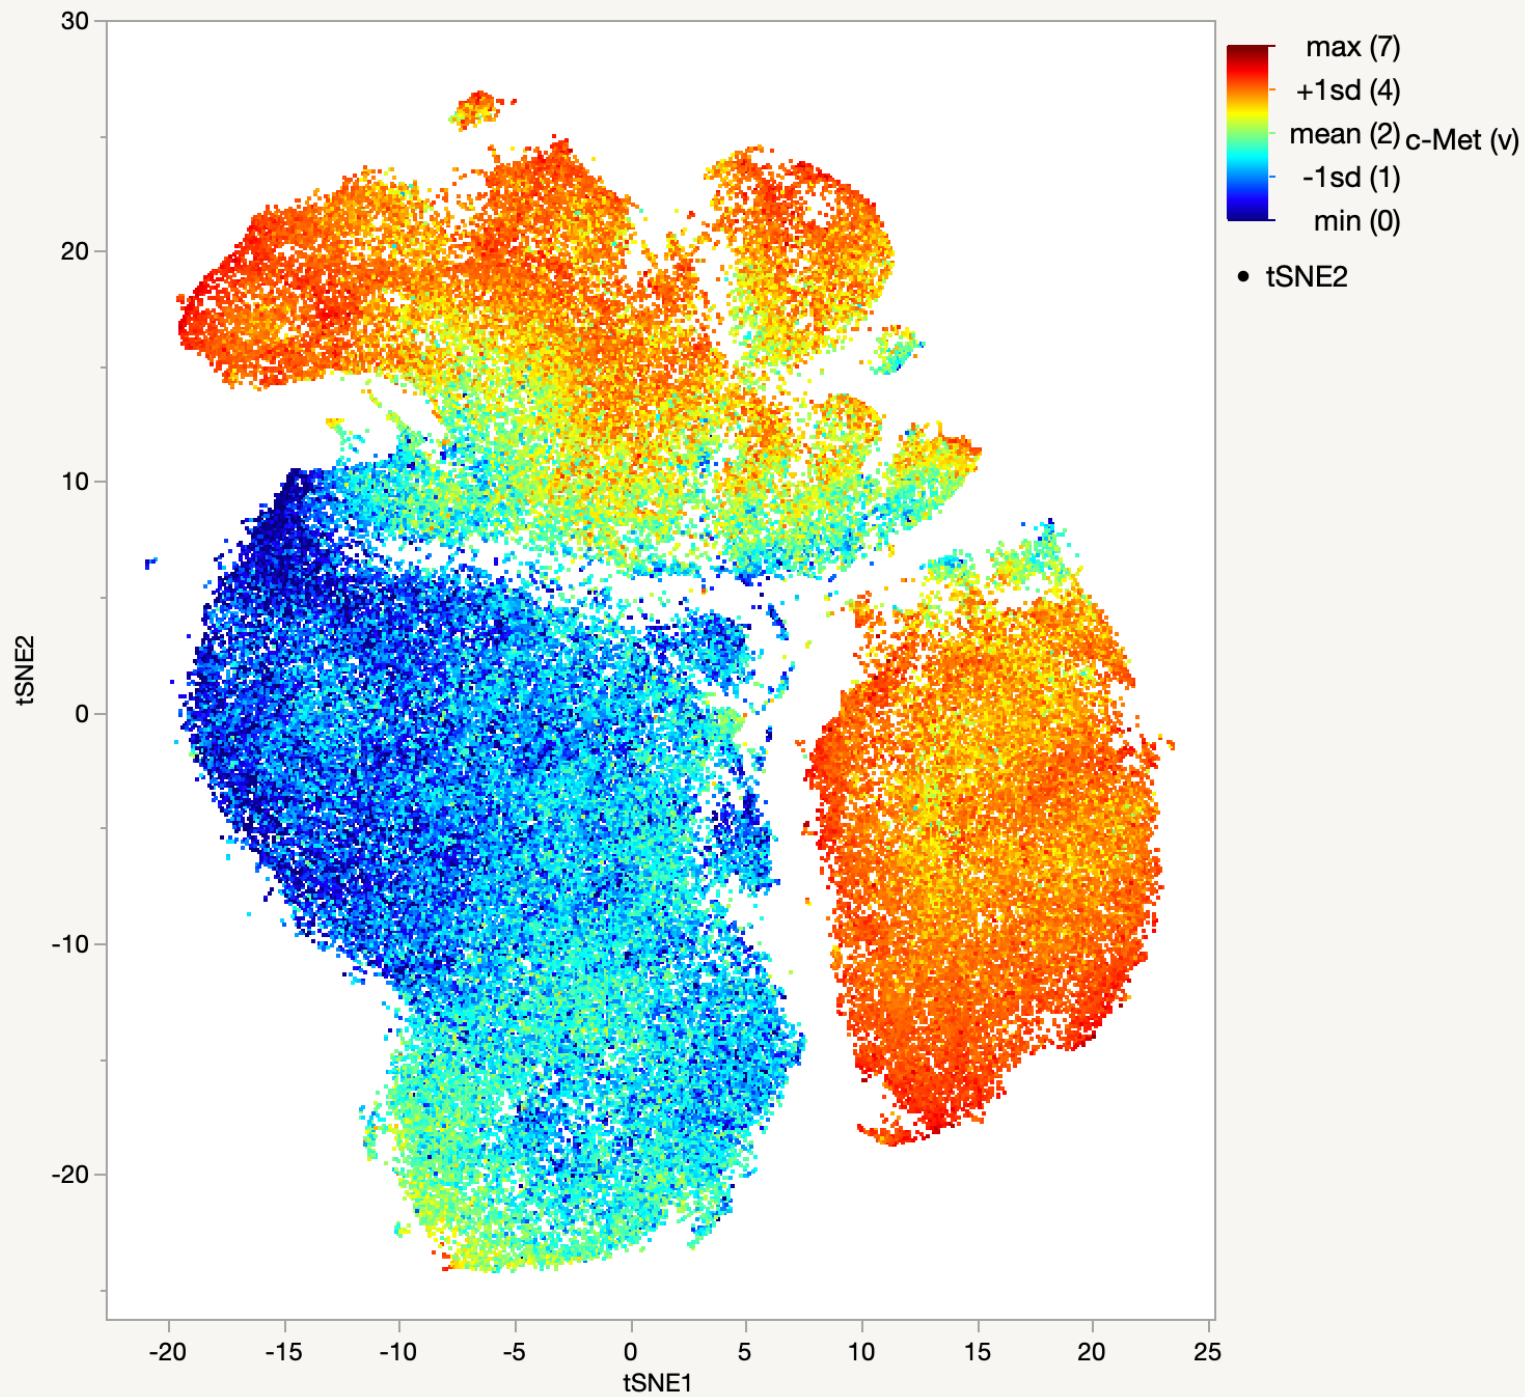

# EGFR

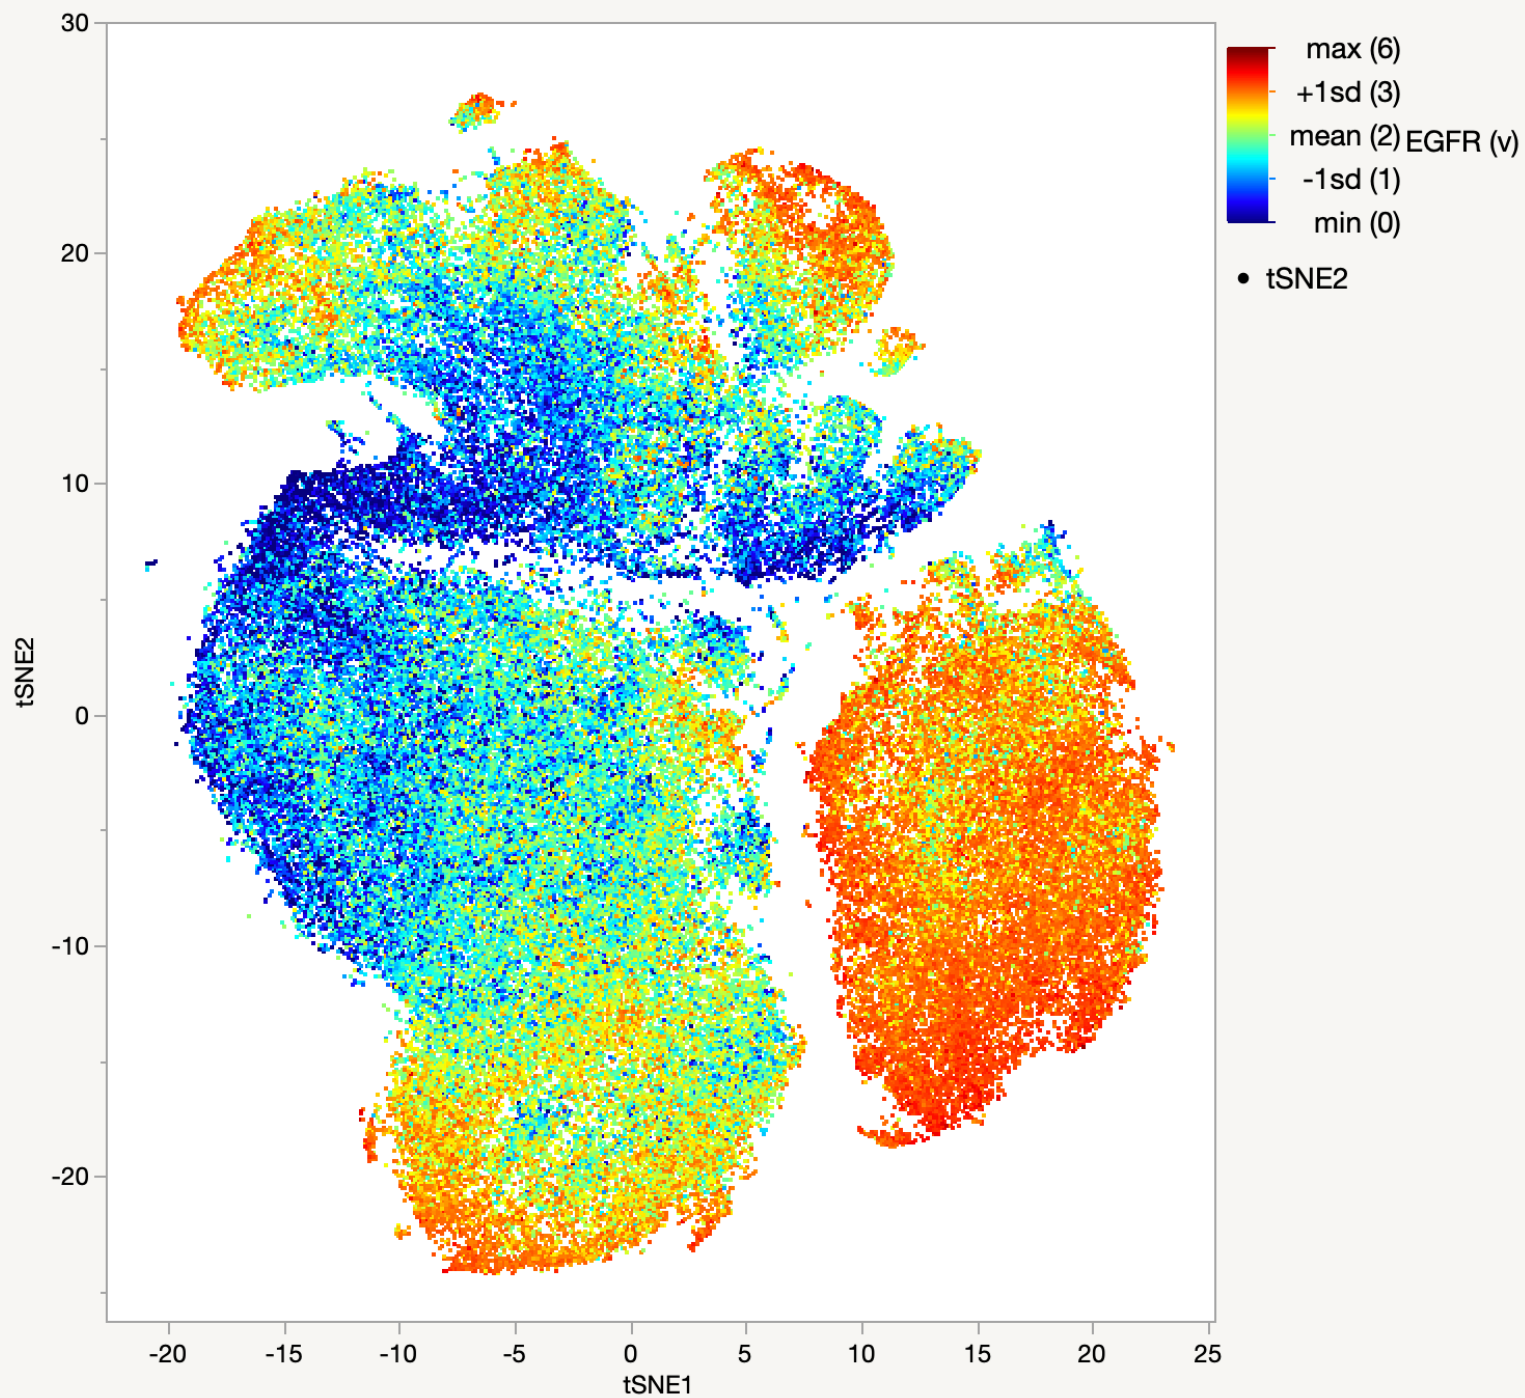

# HER2

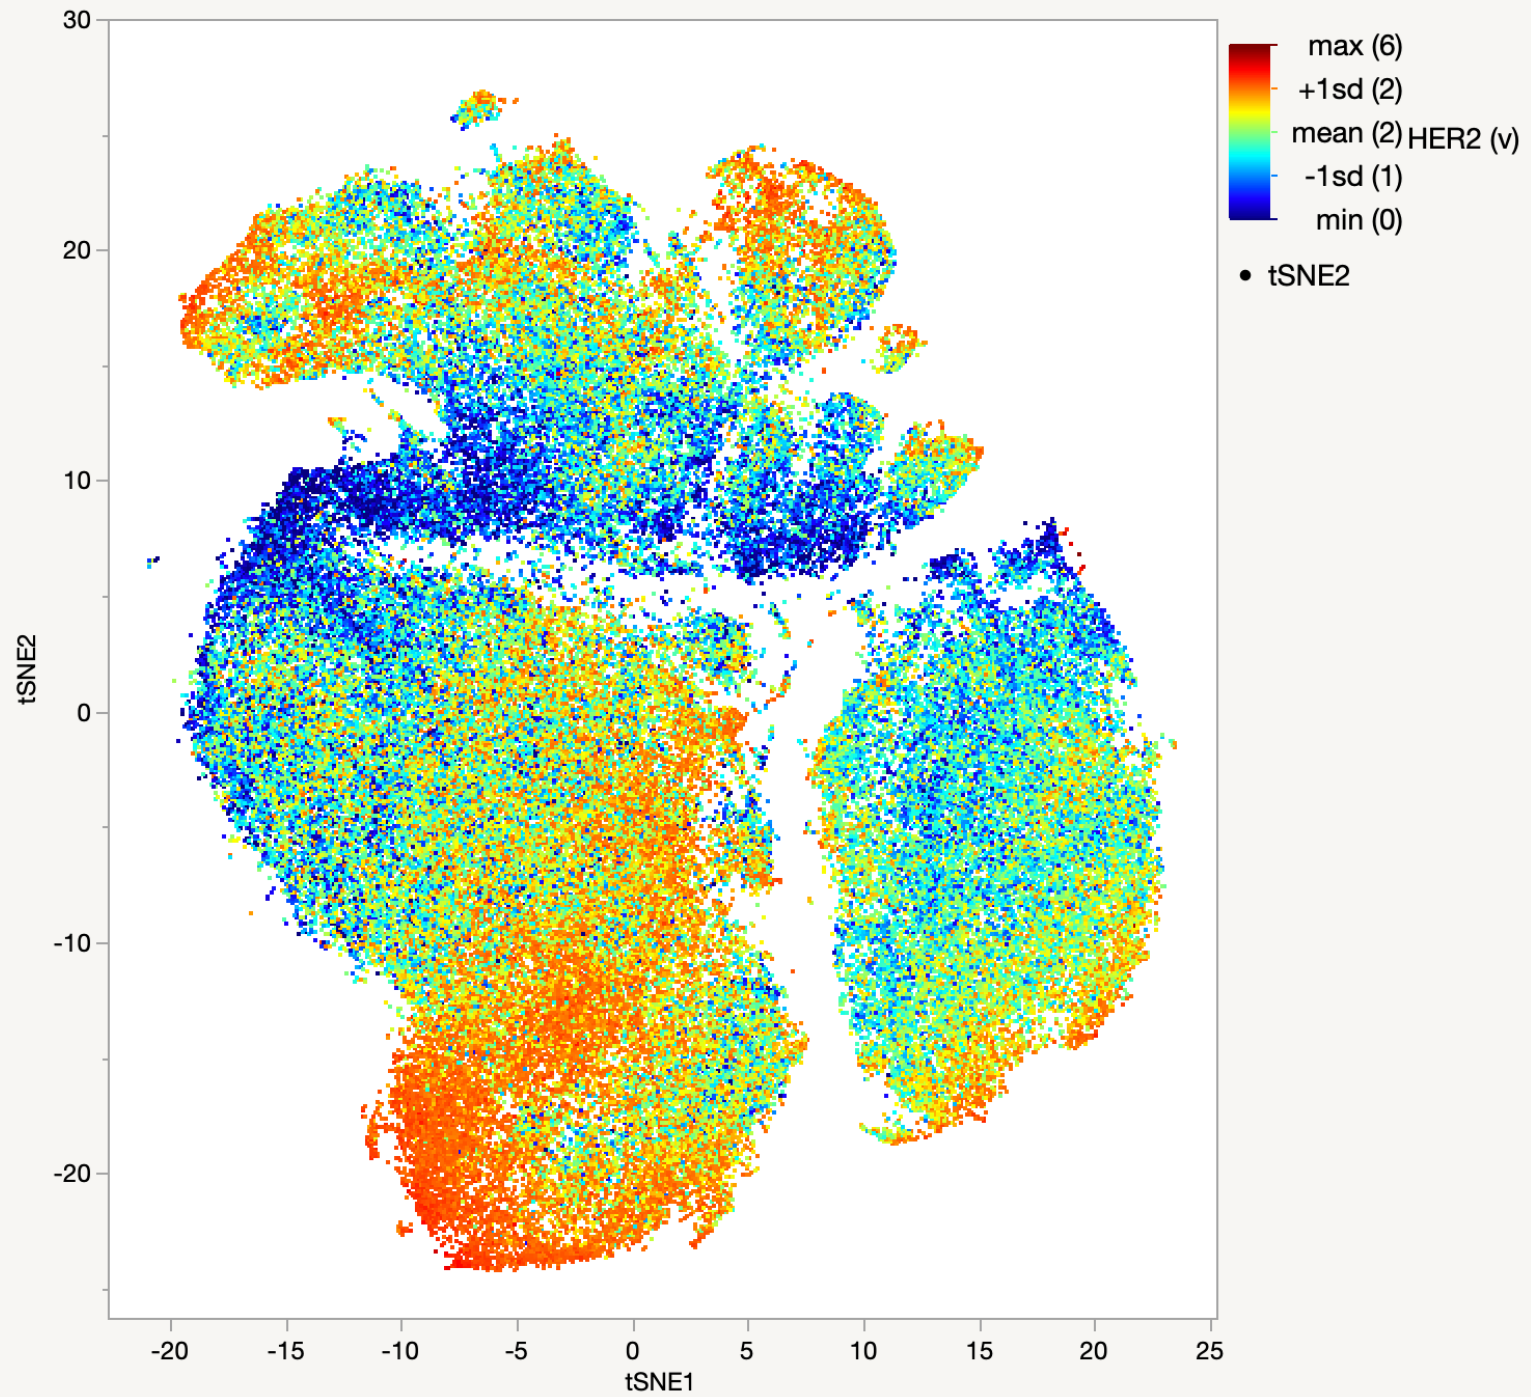

# HER3

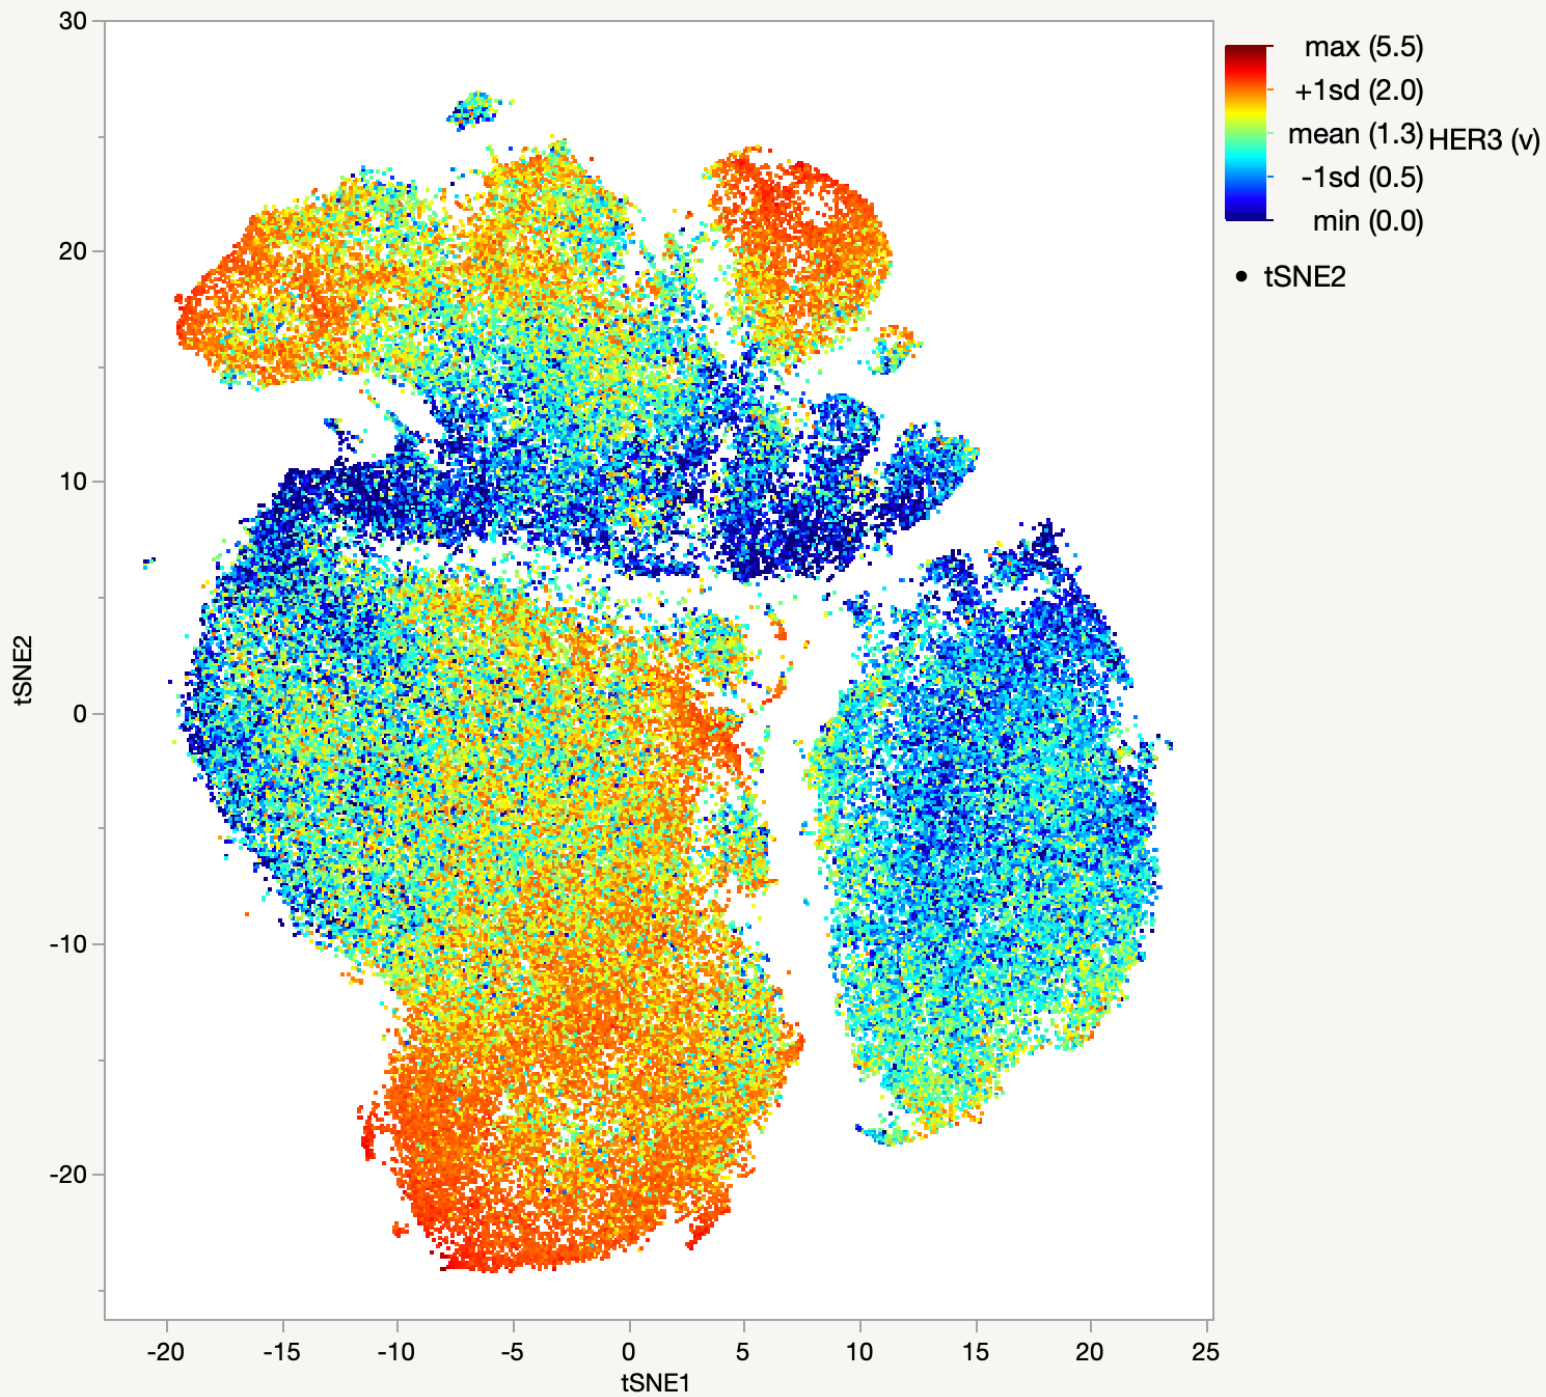

# IGF1R

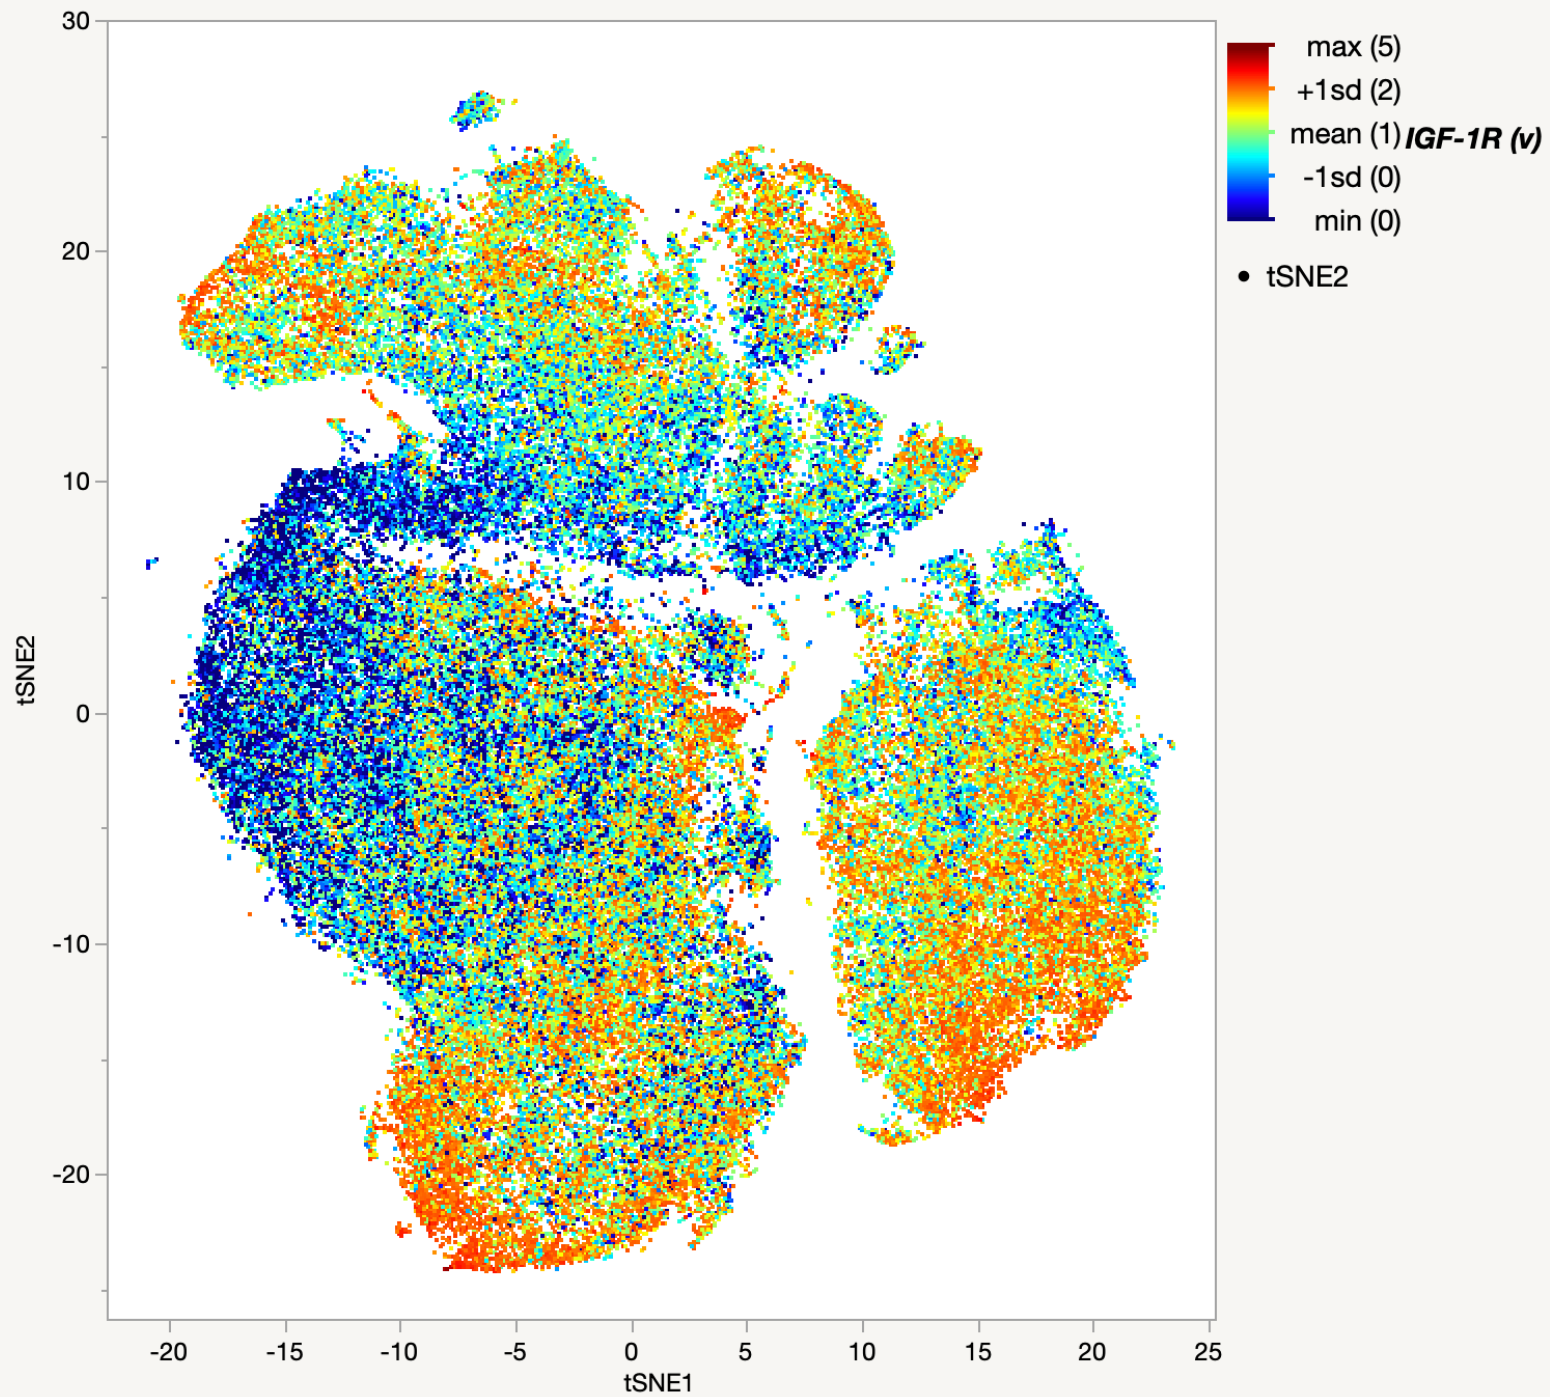

# Ki-67

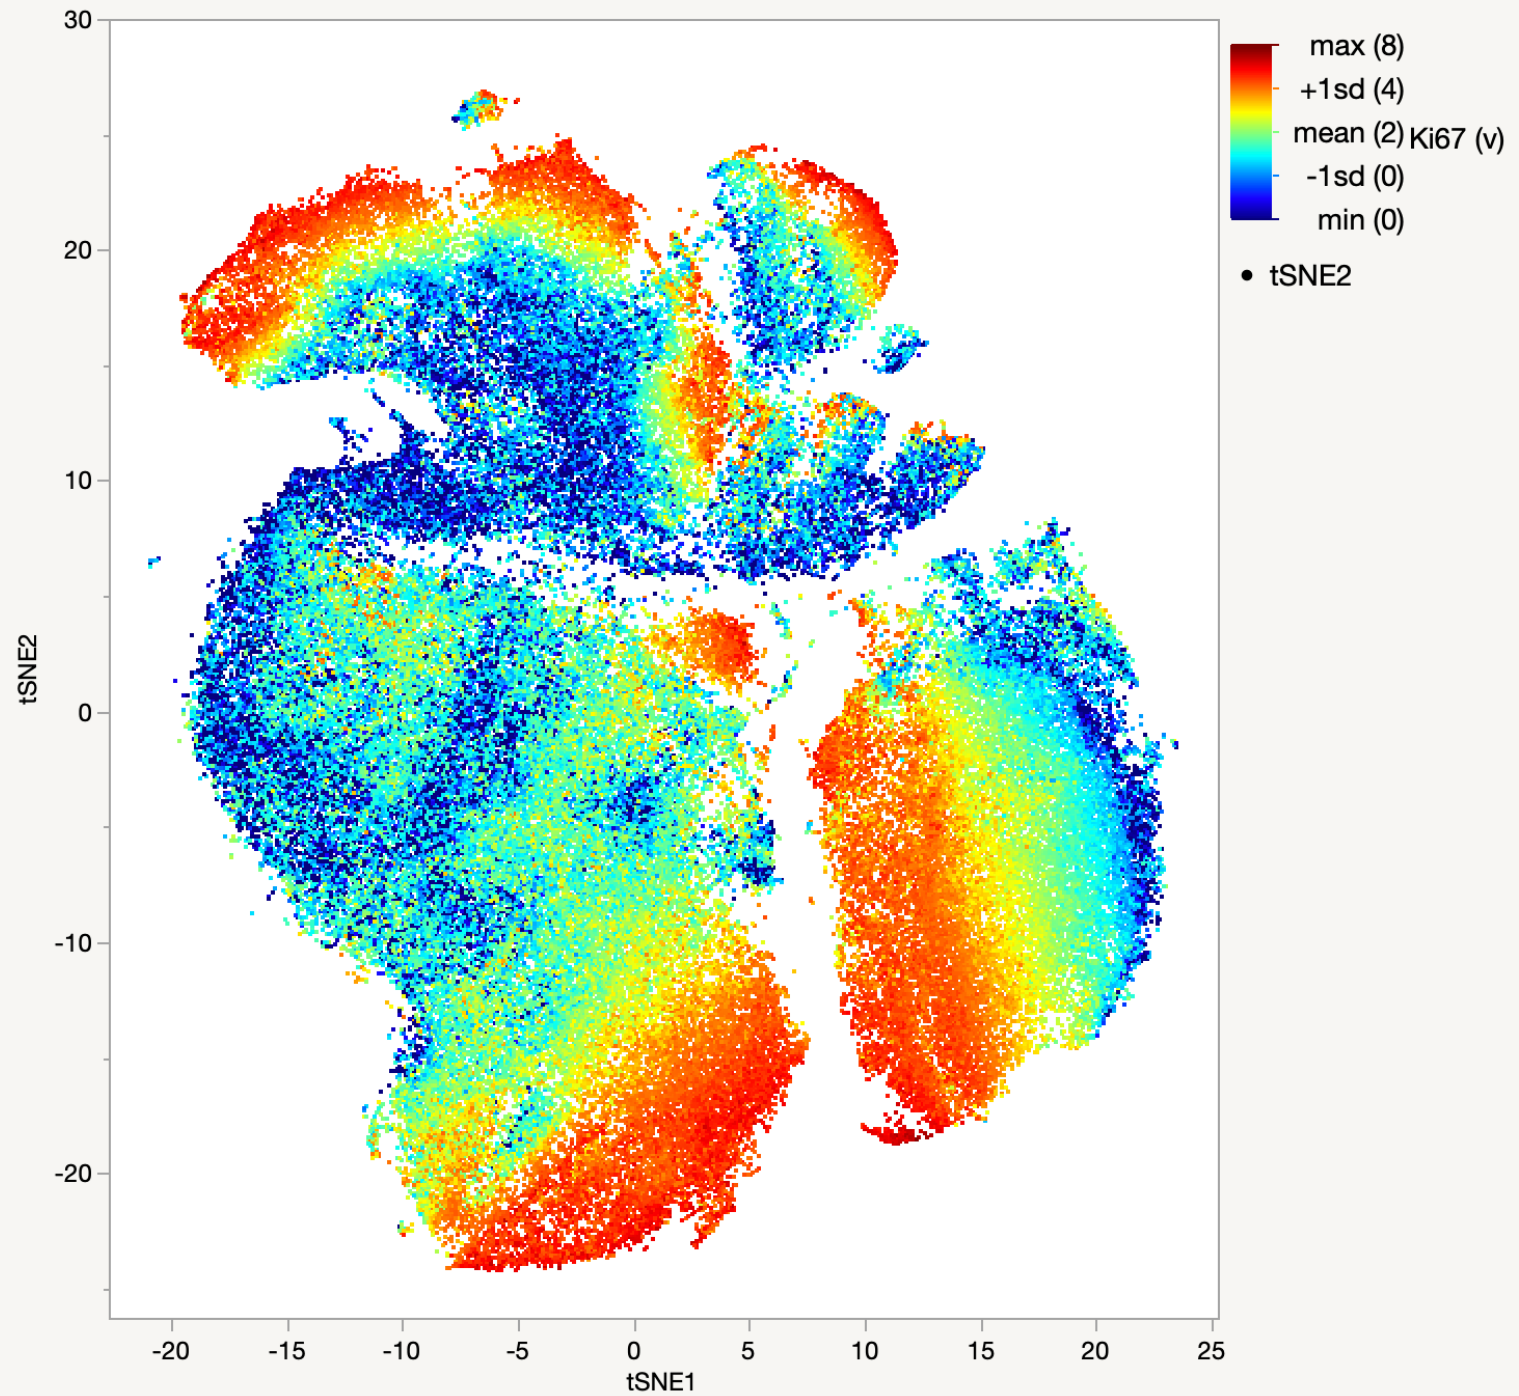

p4EBP1

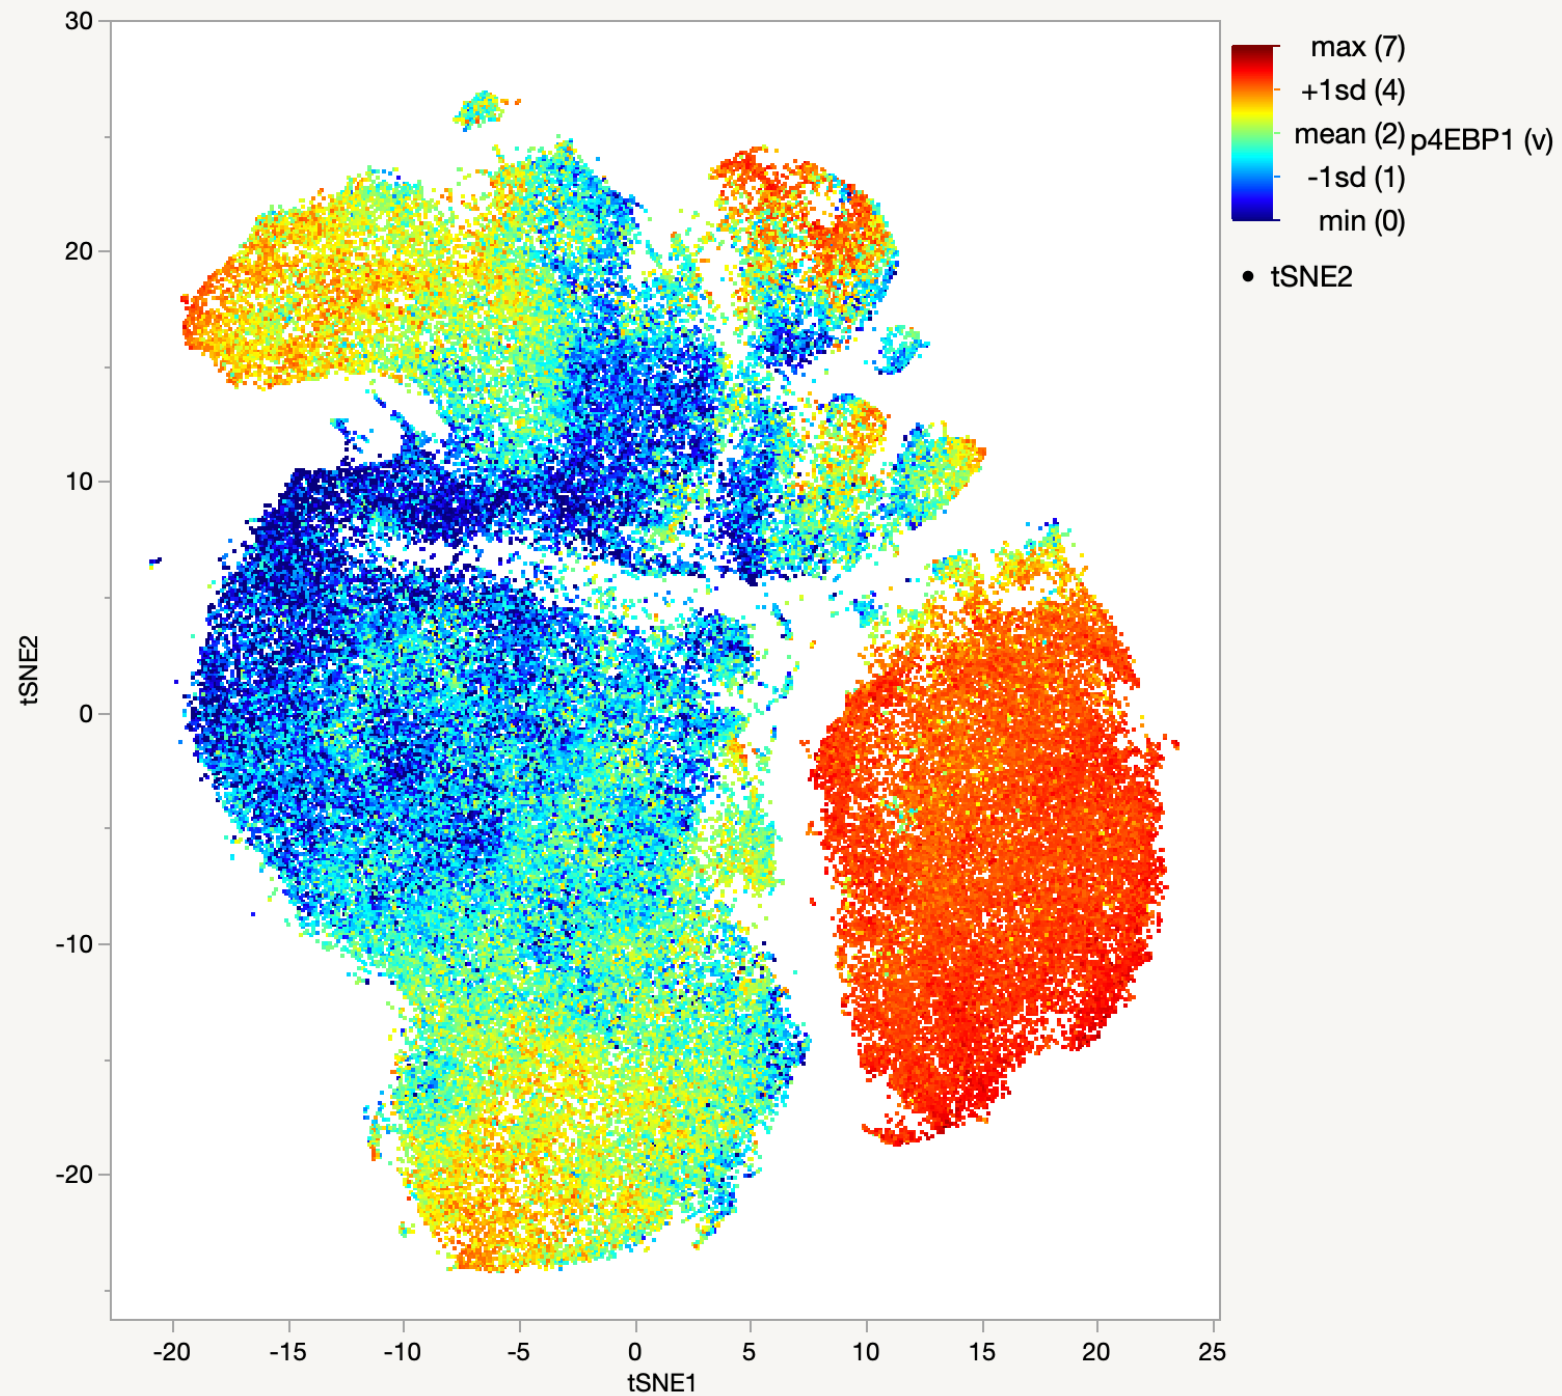



pAkt308

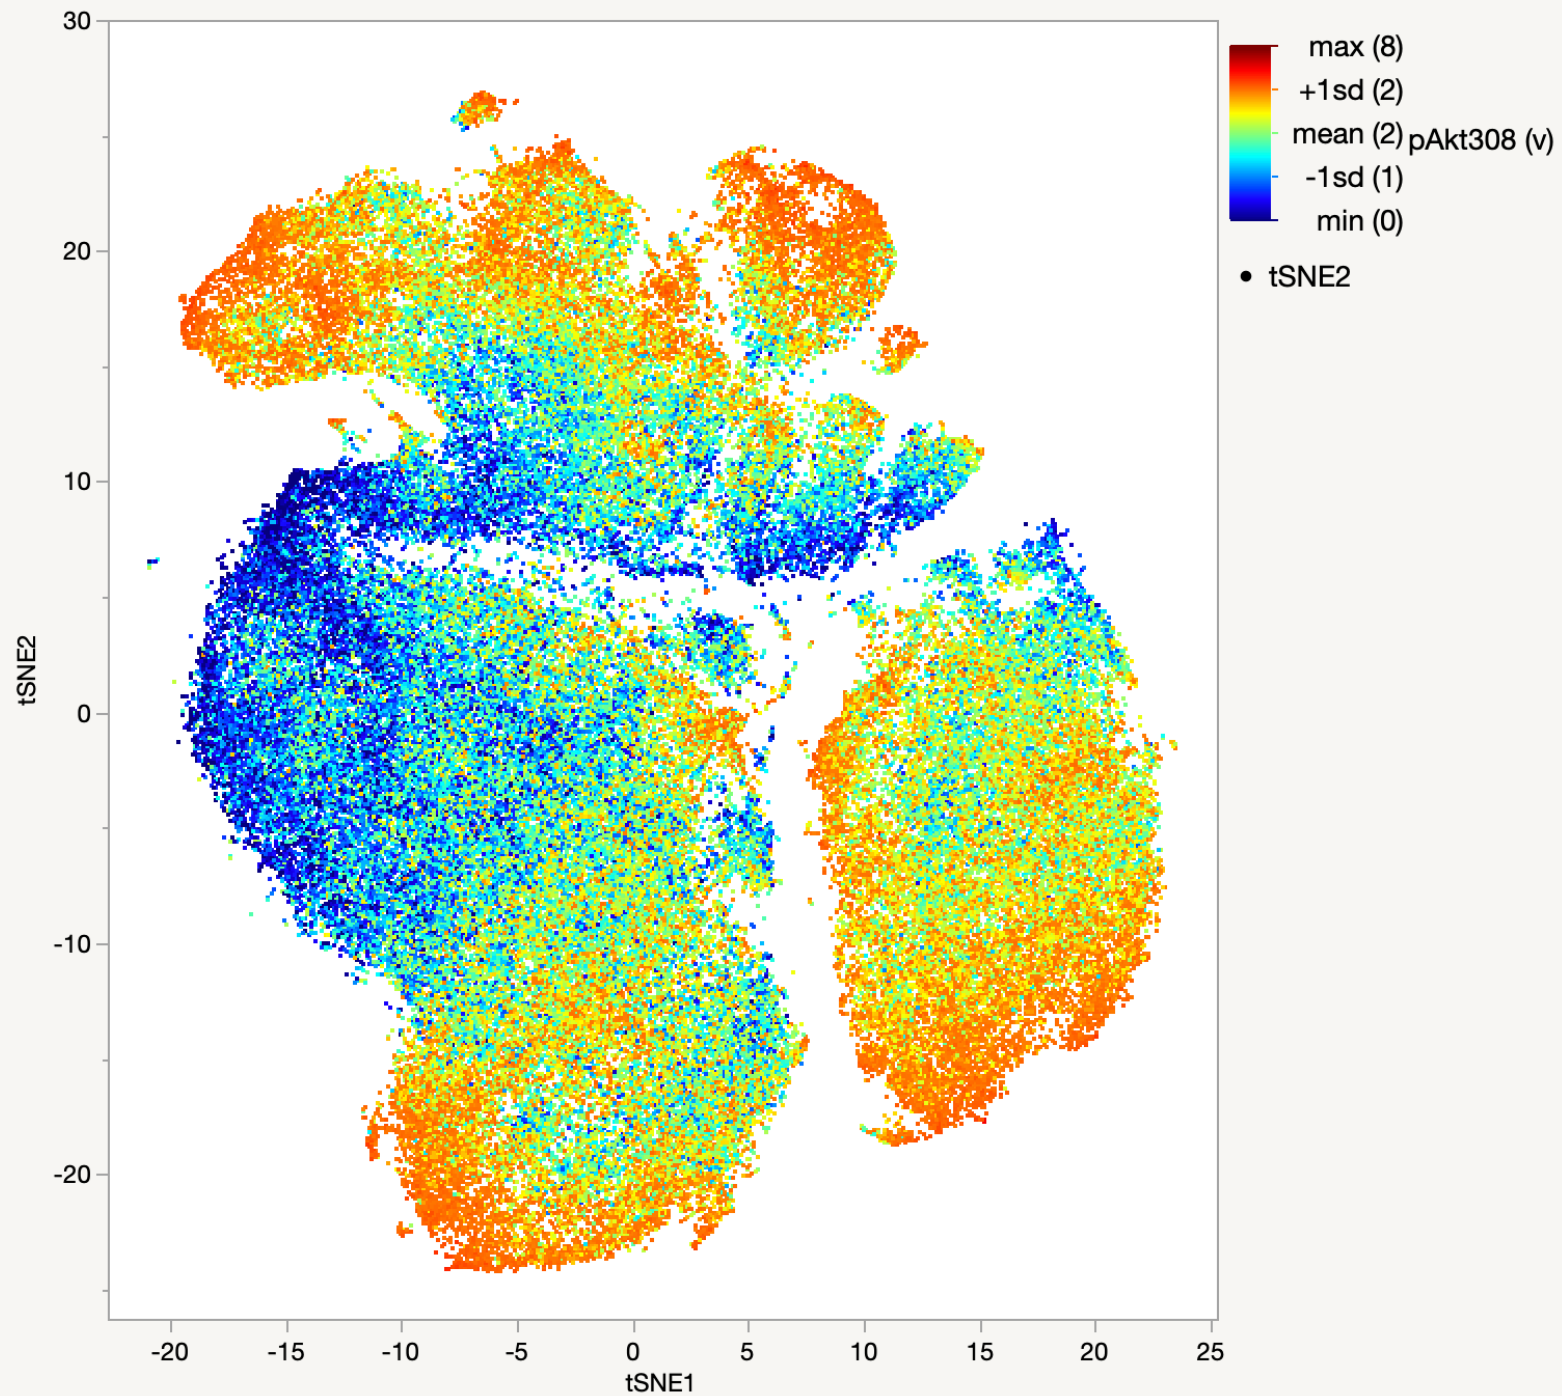

pAkt473

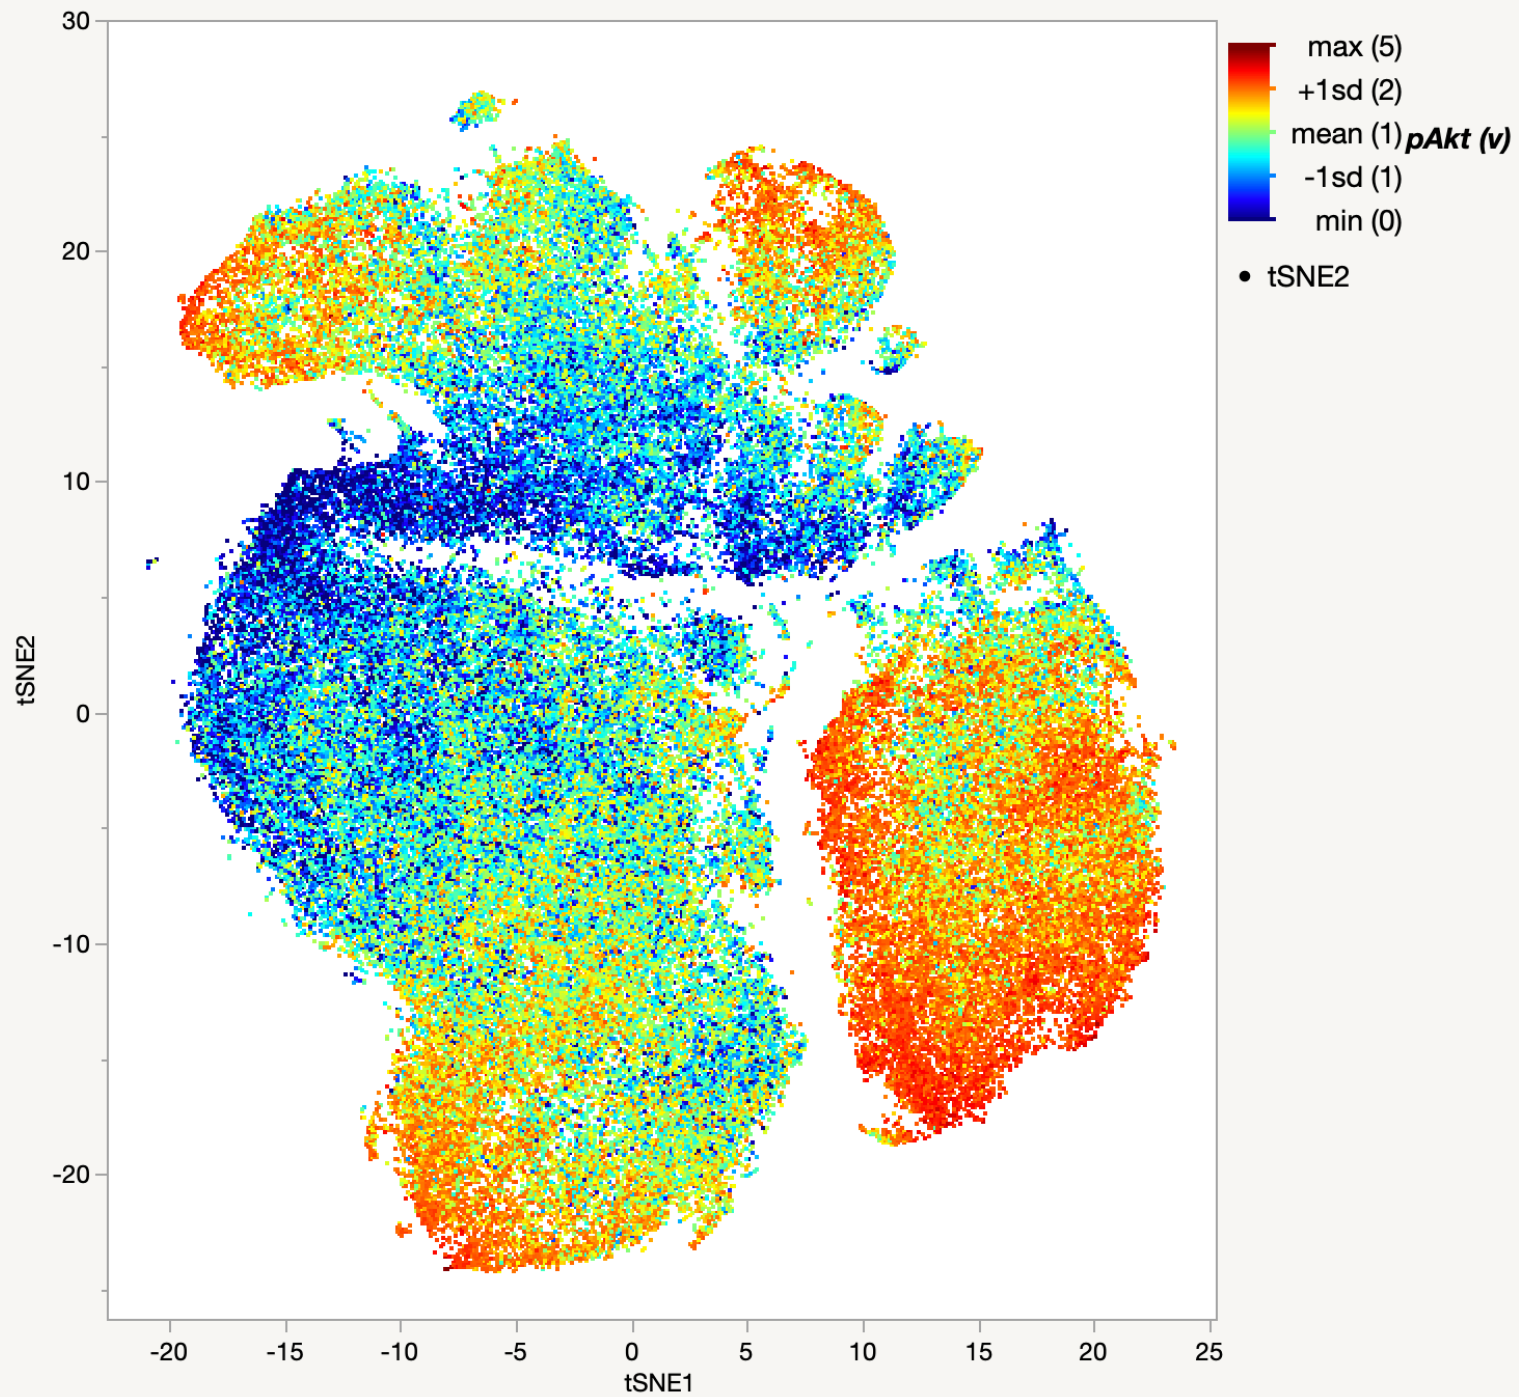

pS6

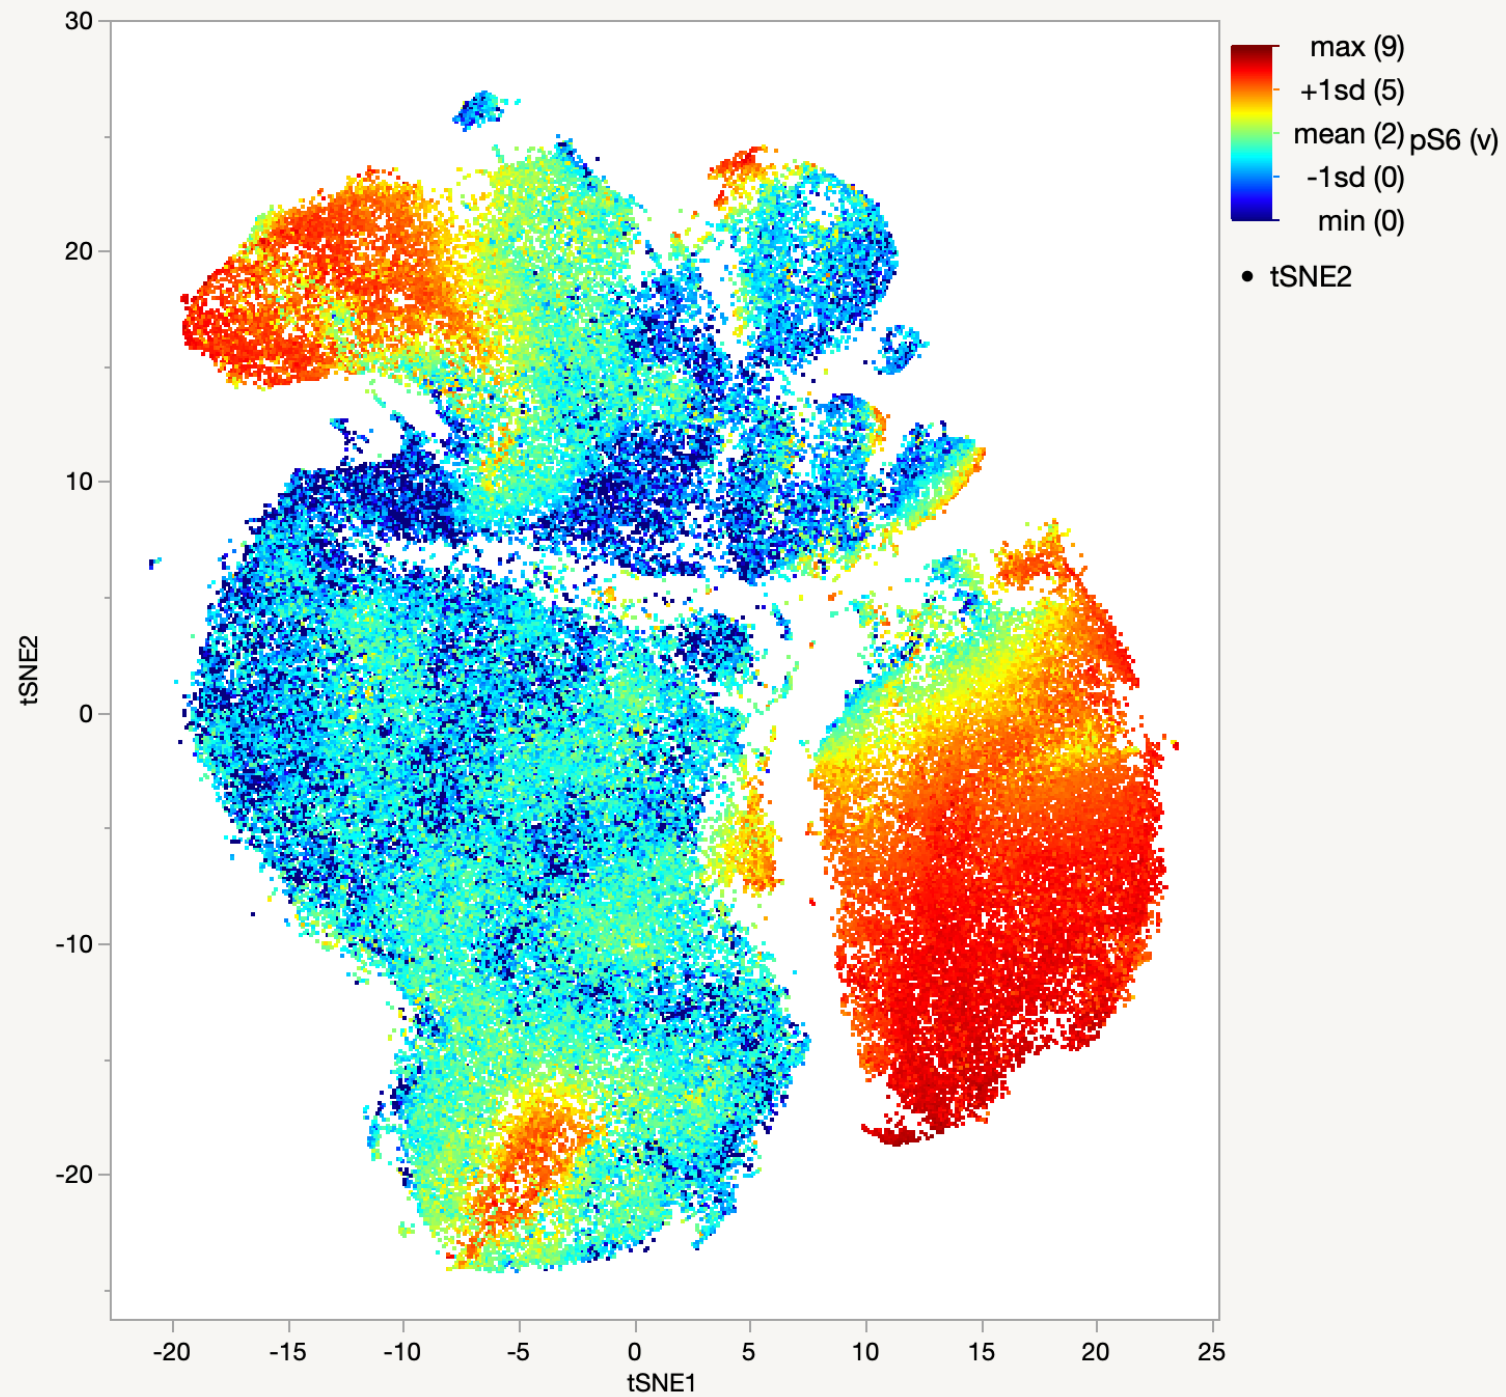

p-p90RSK

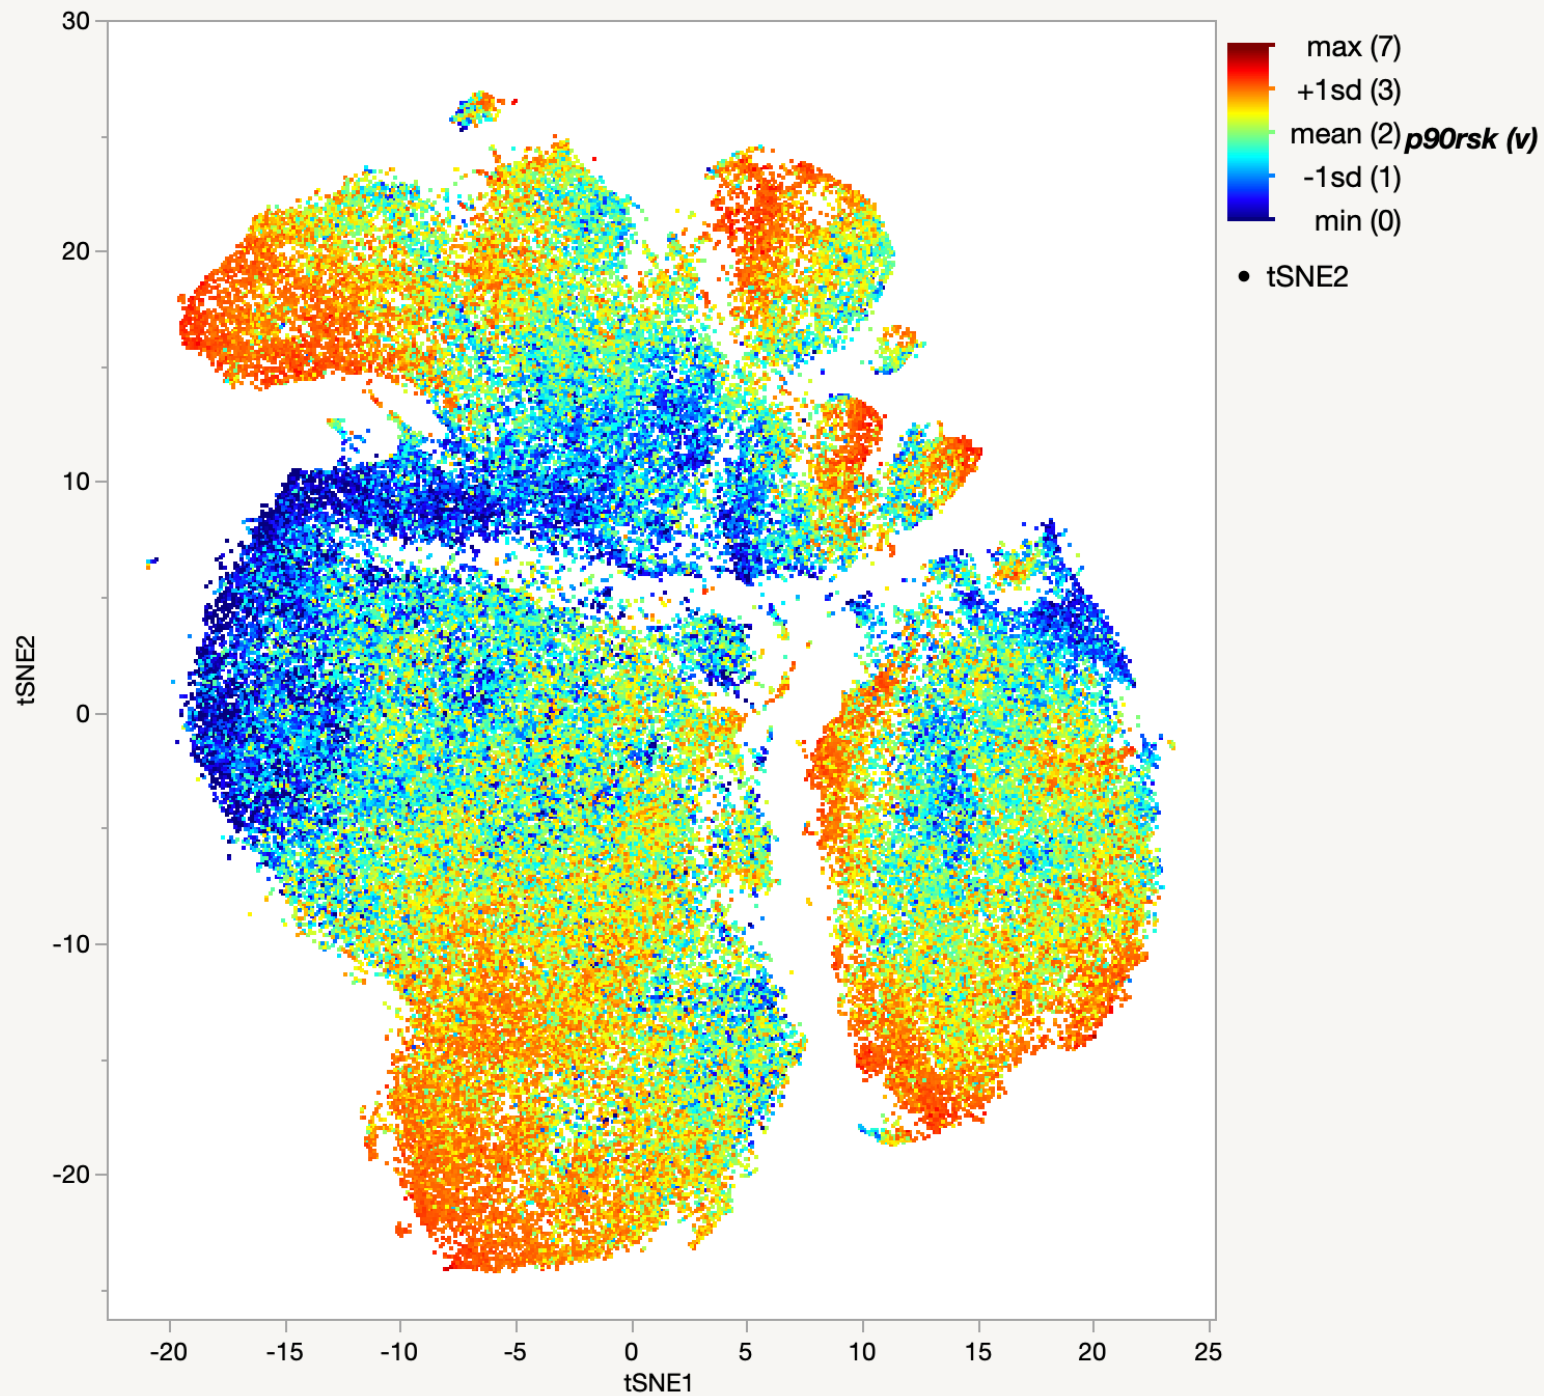

p-p38

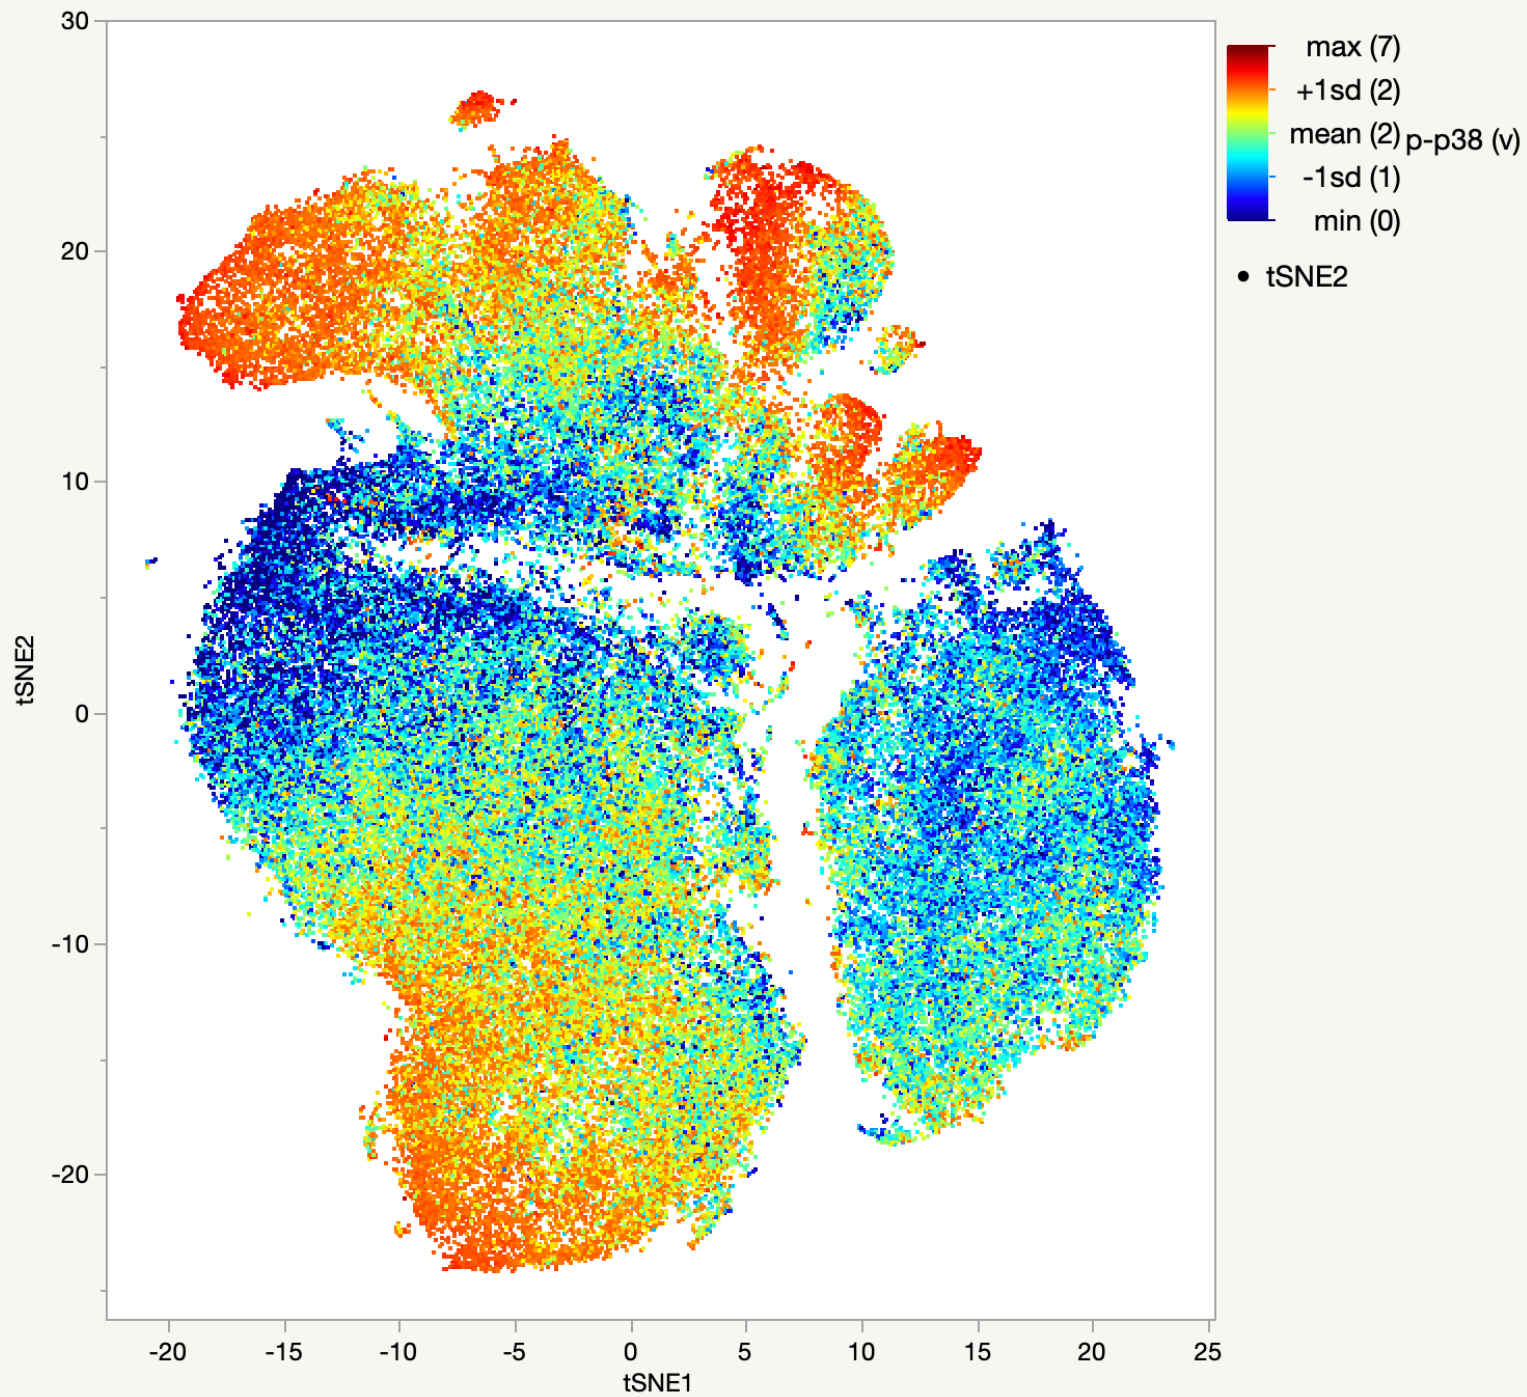

pErk

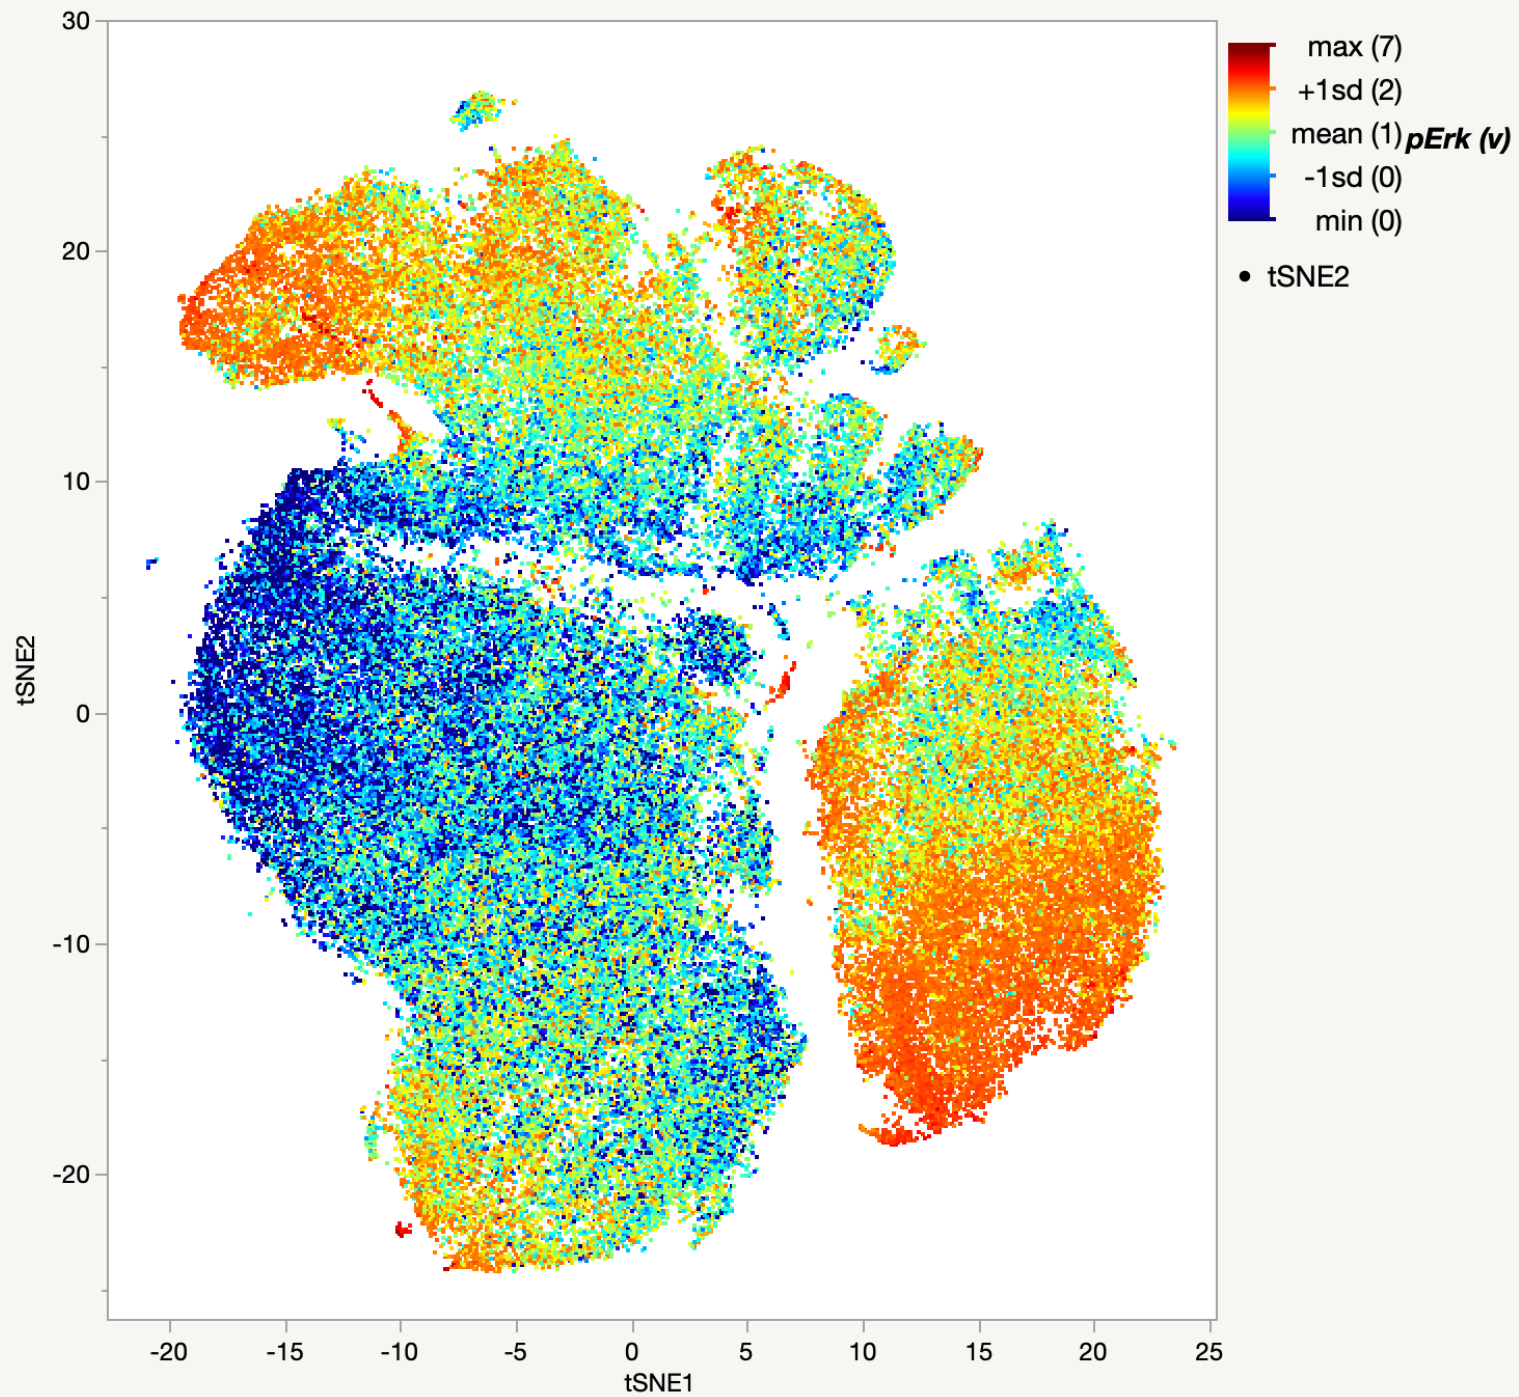

pJnk

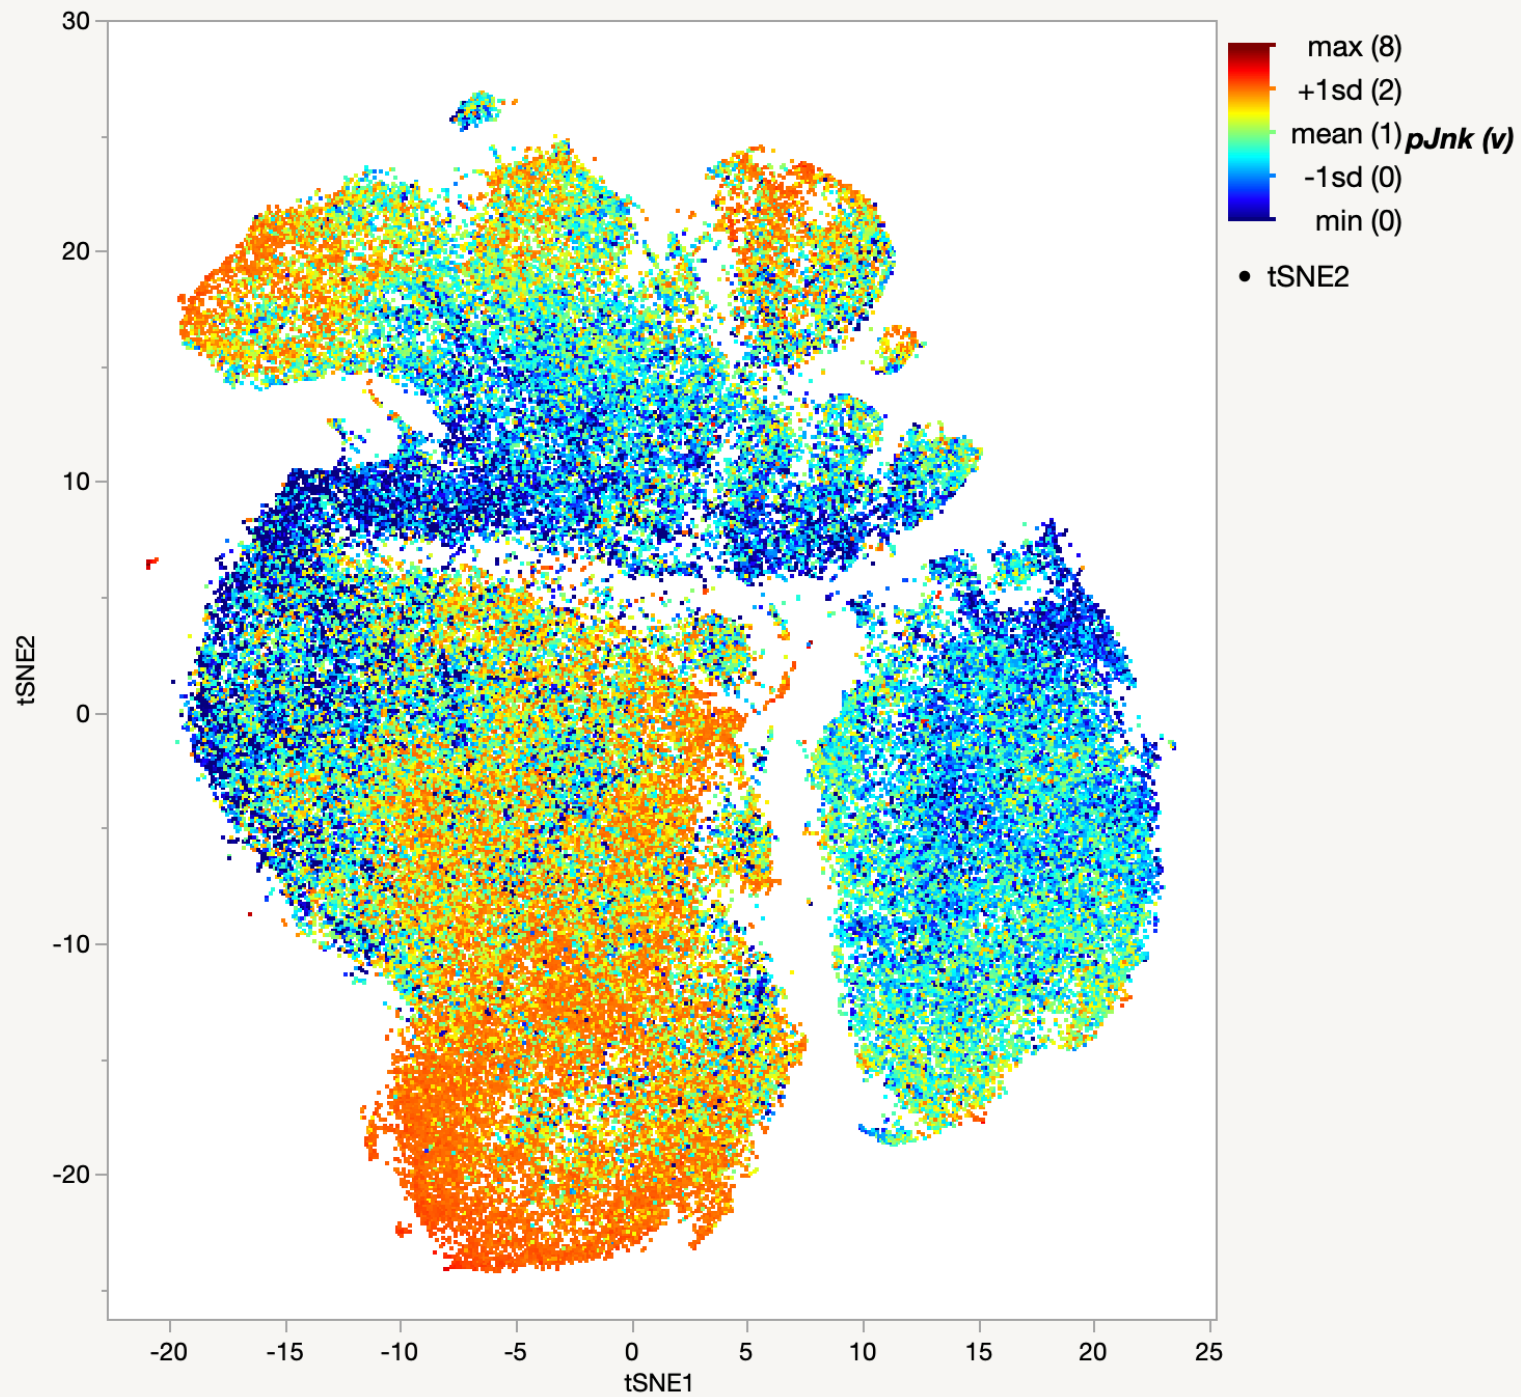

pStat1

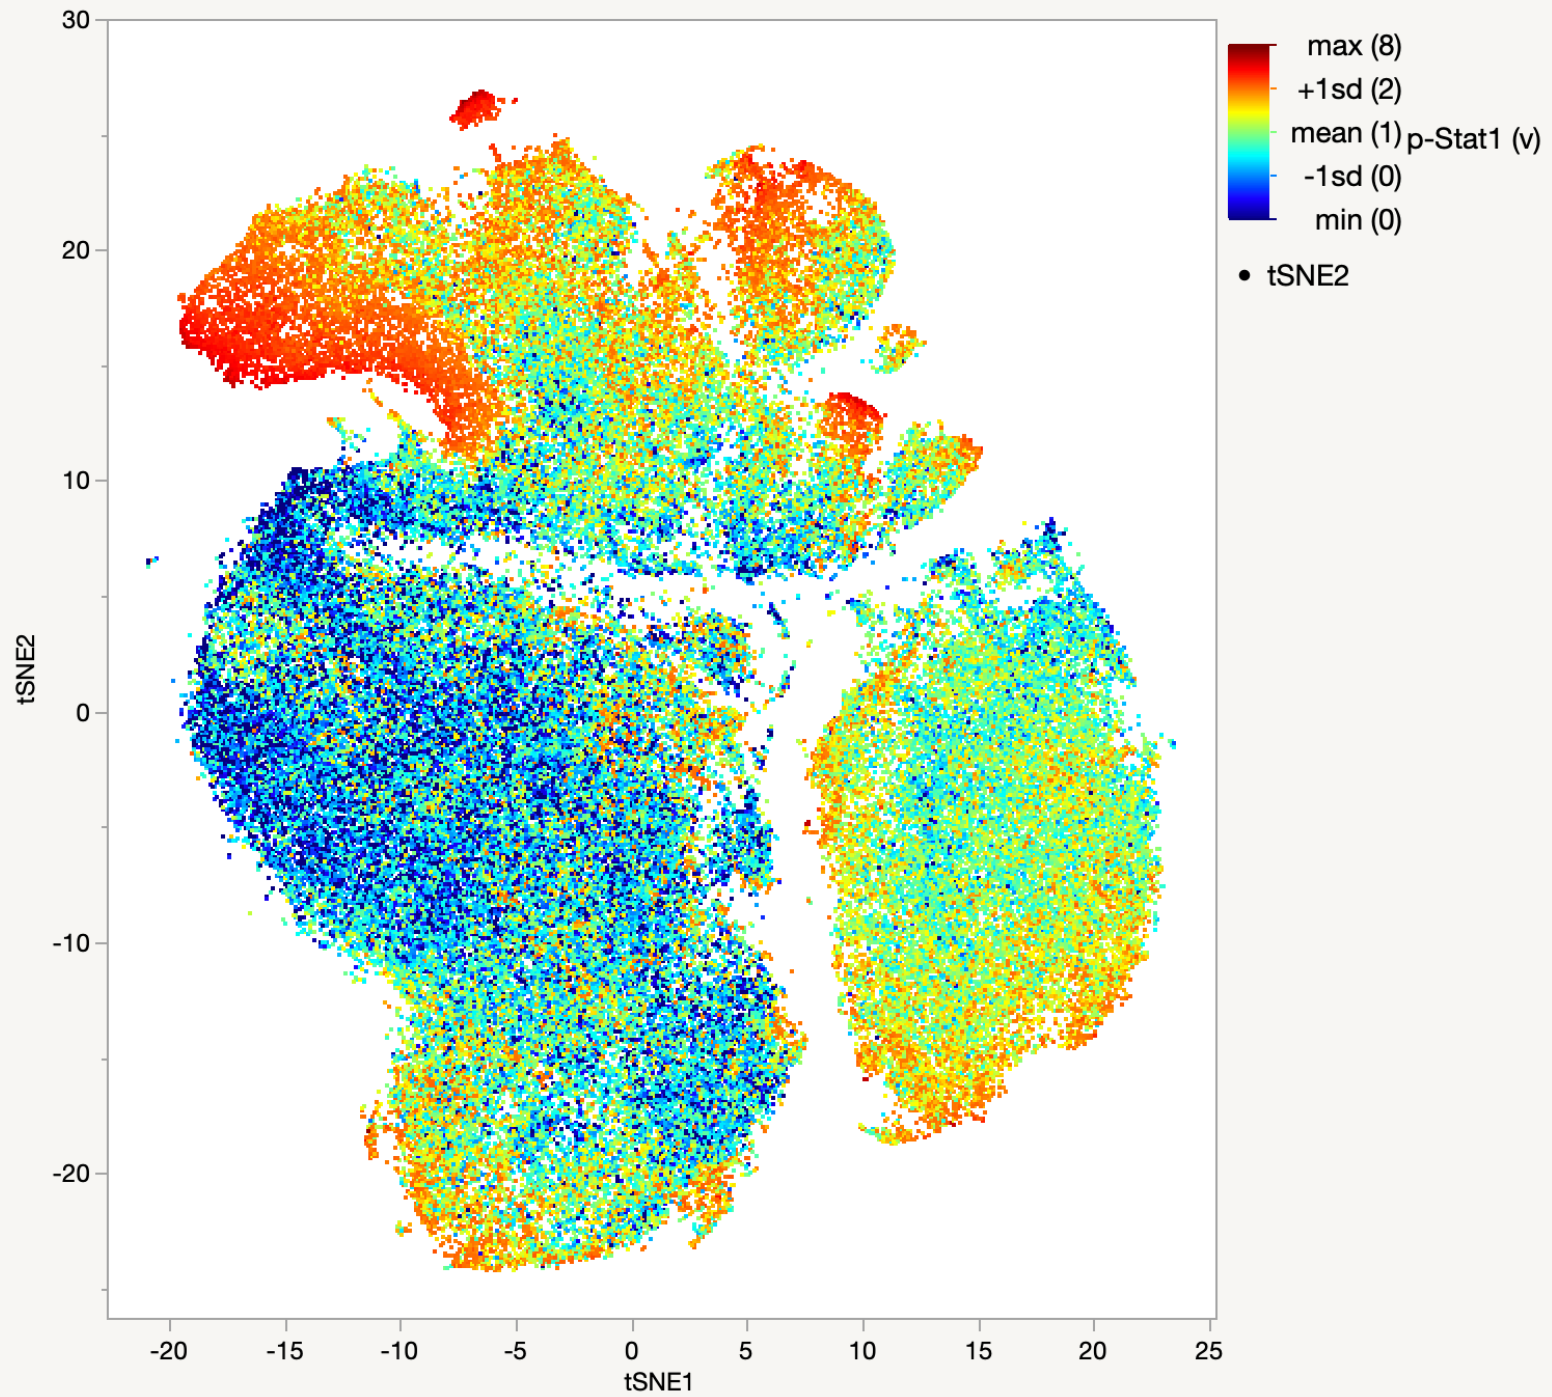



pStat3

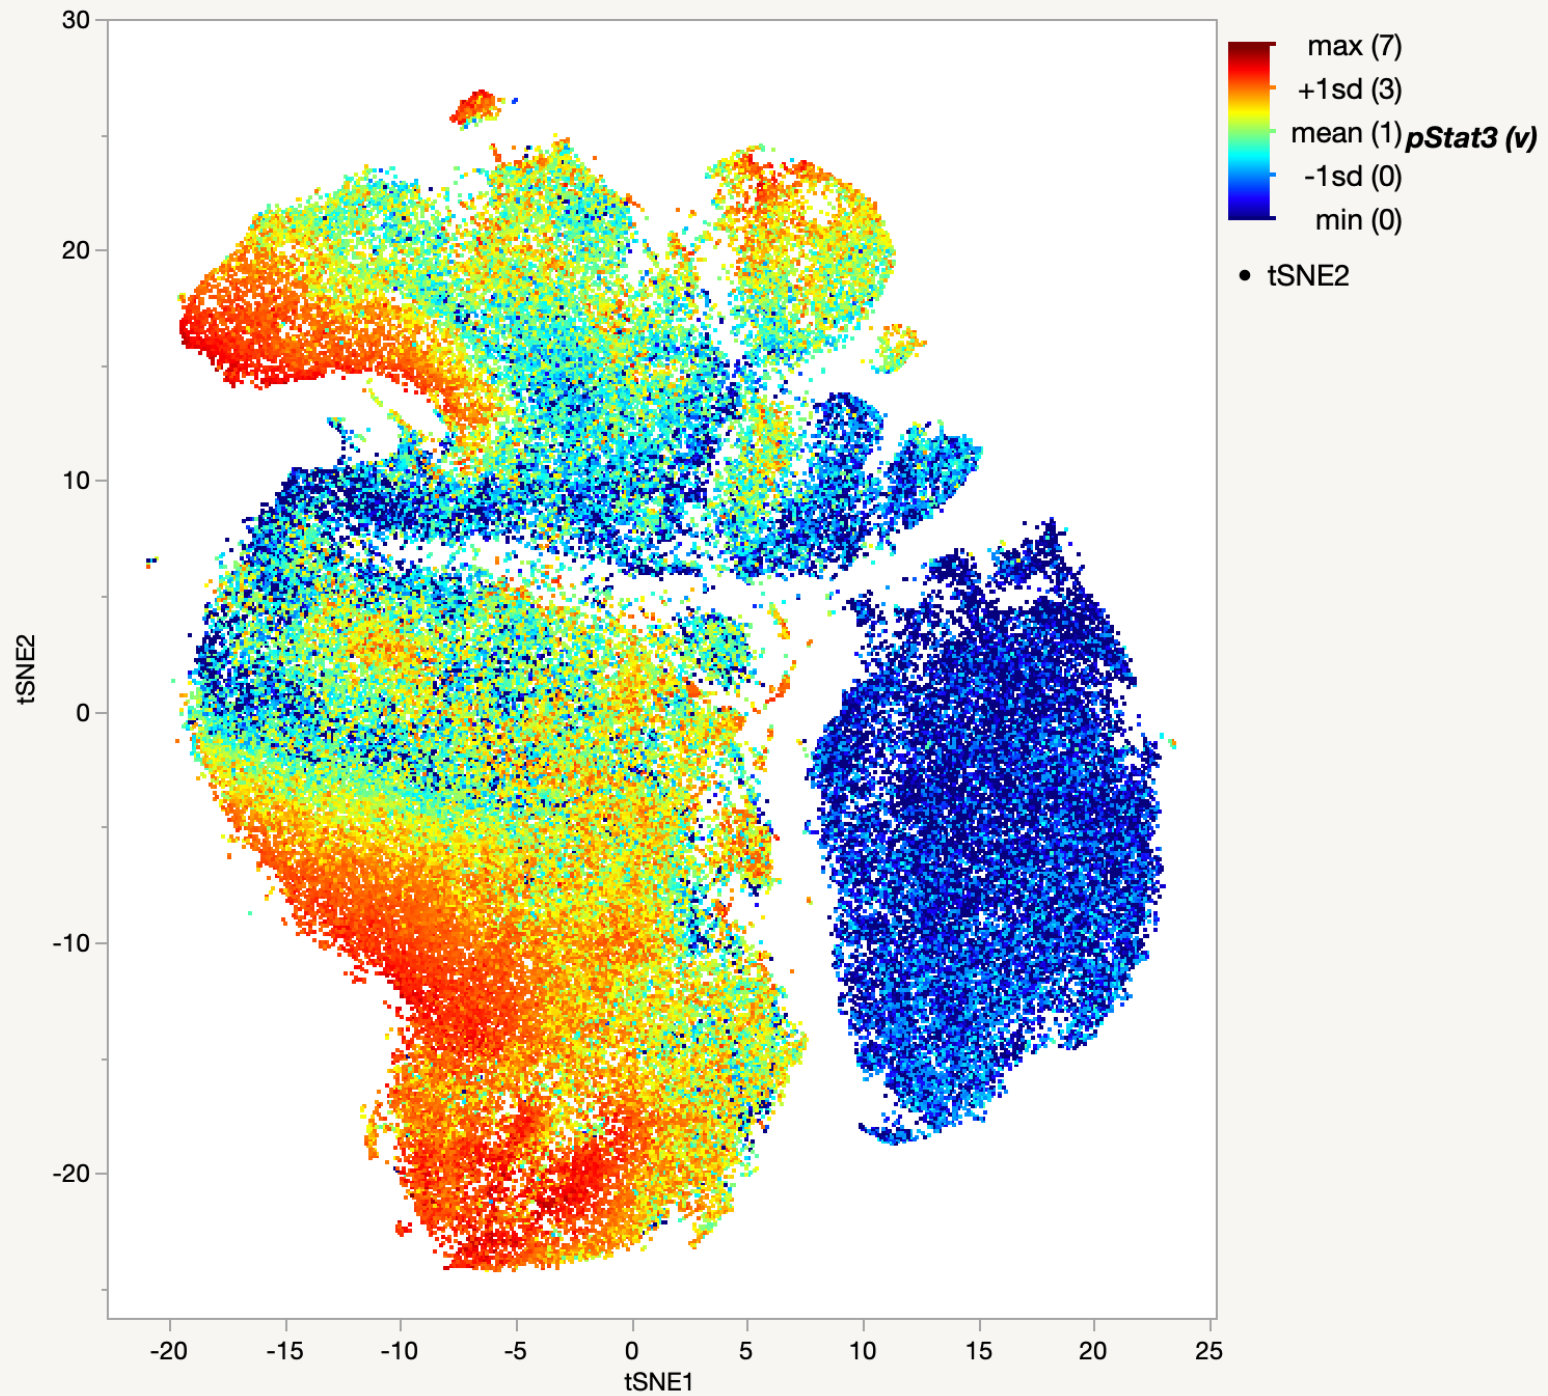

pStat5

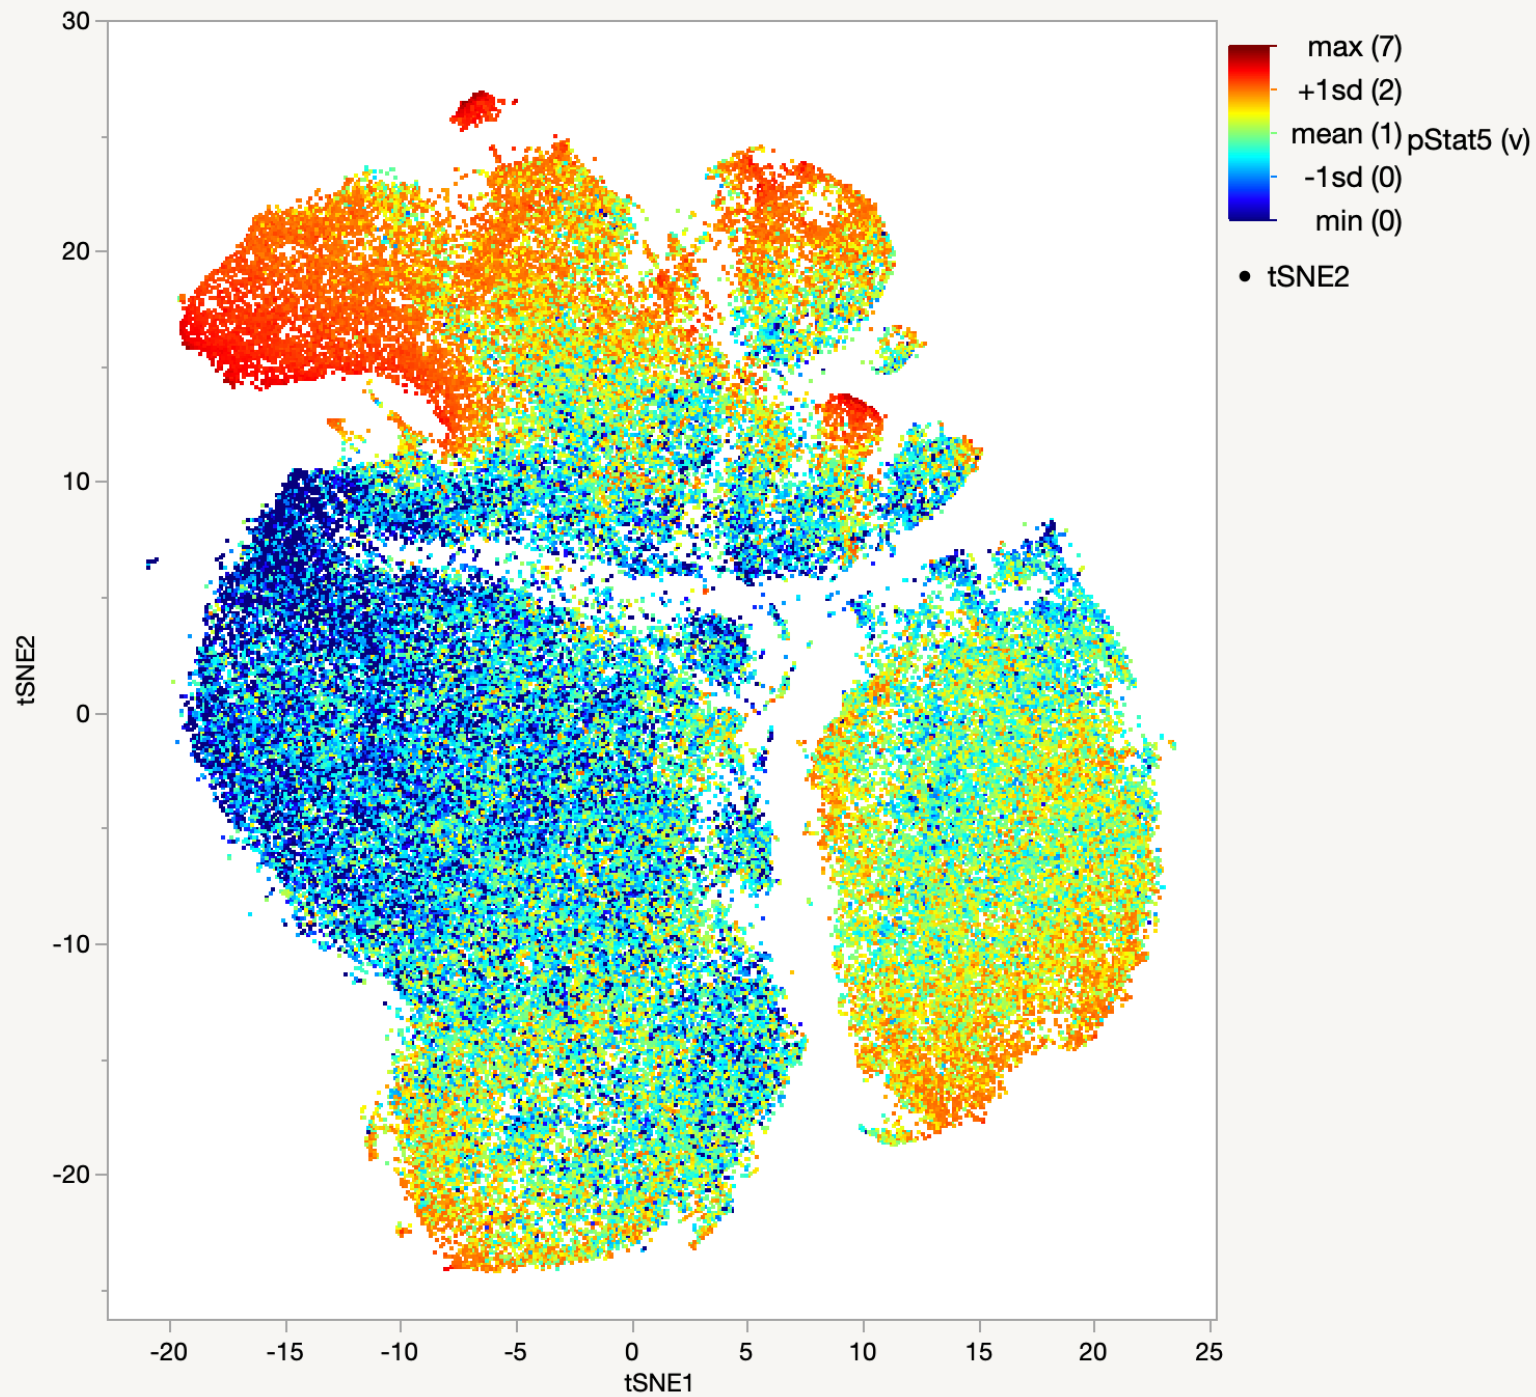

$\beta$ -Cat

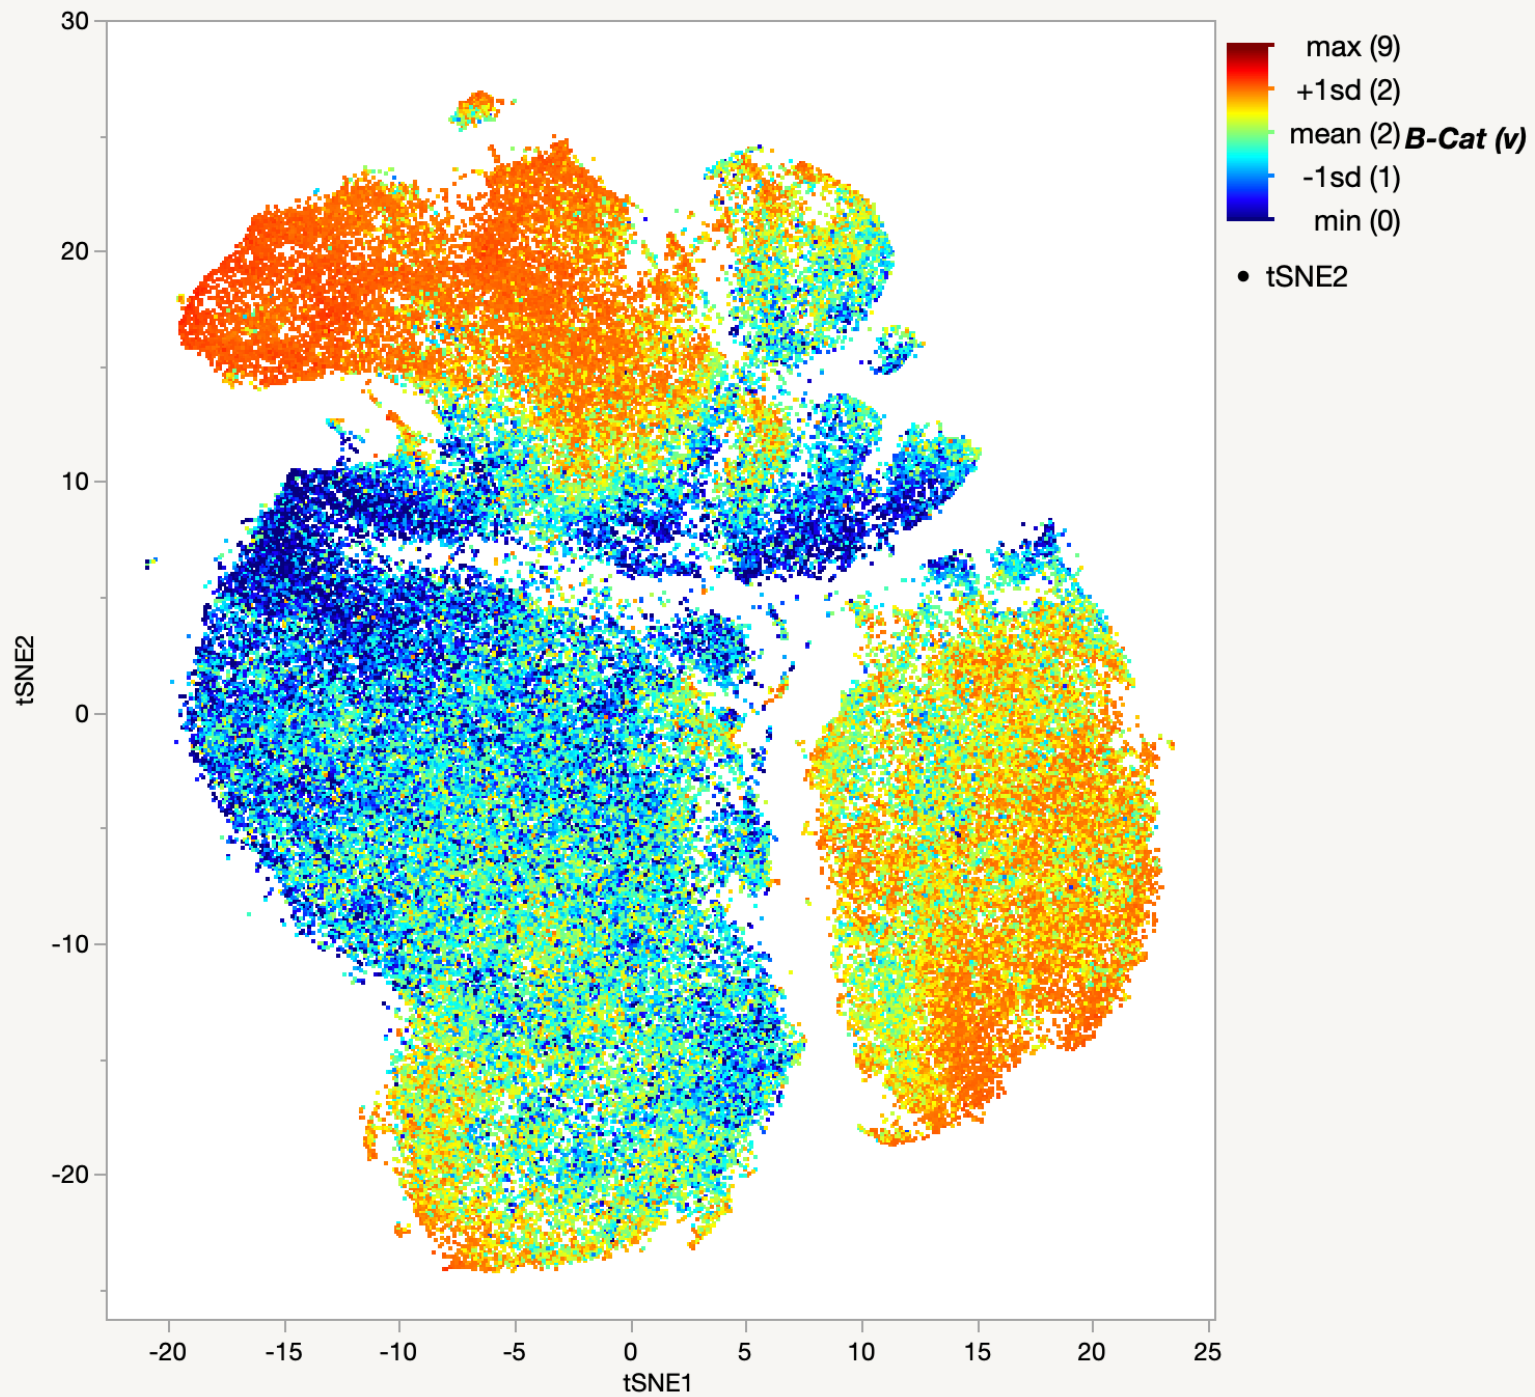

c-Myc

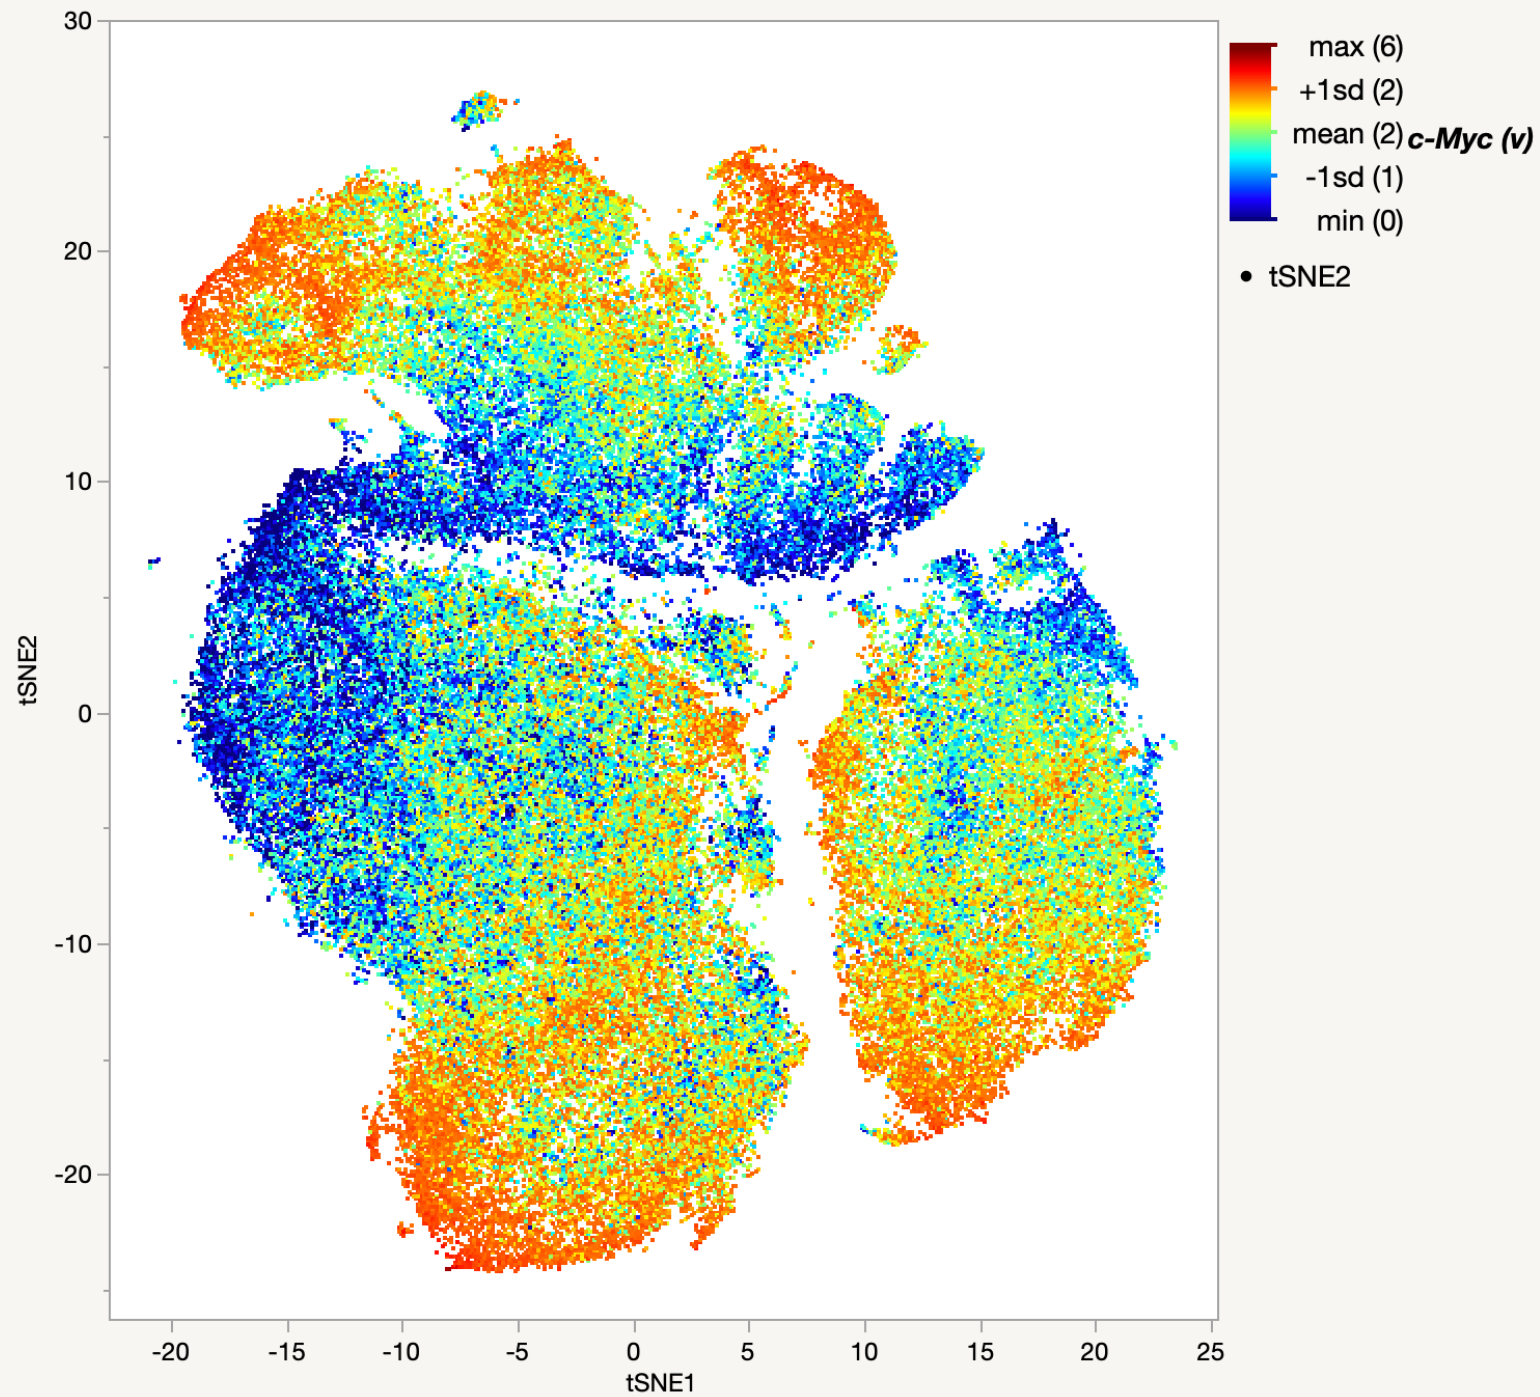

# CD44

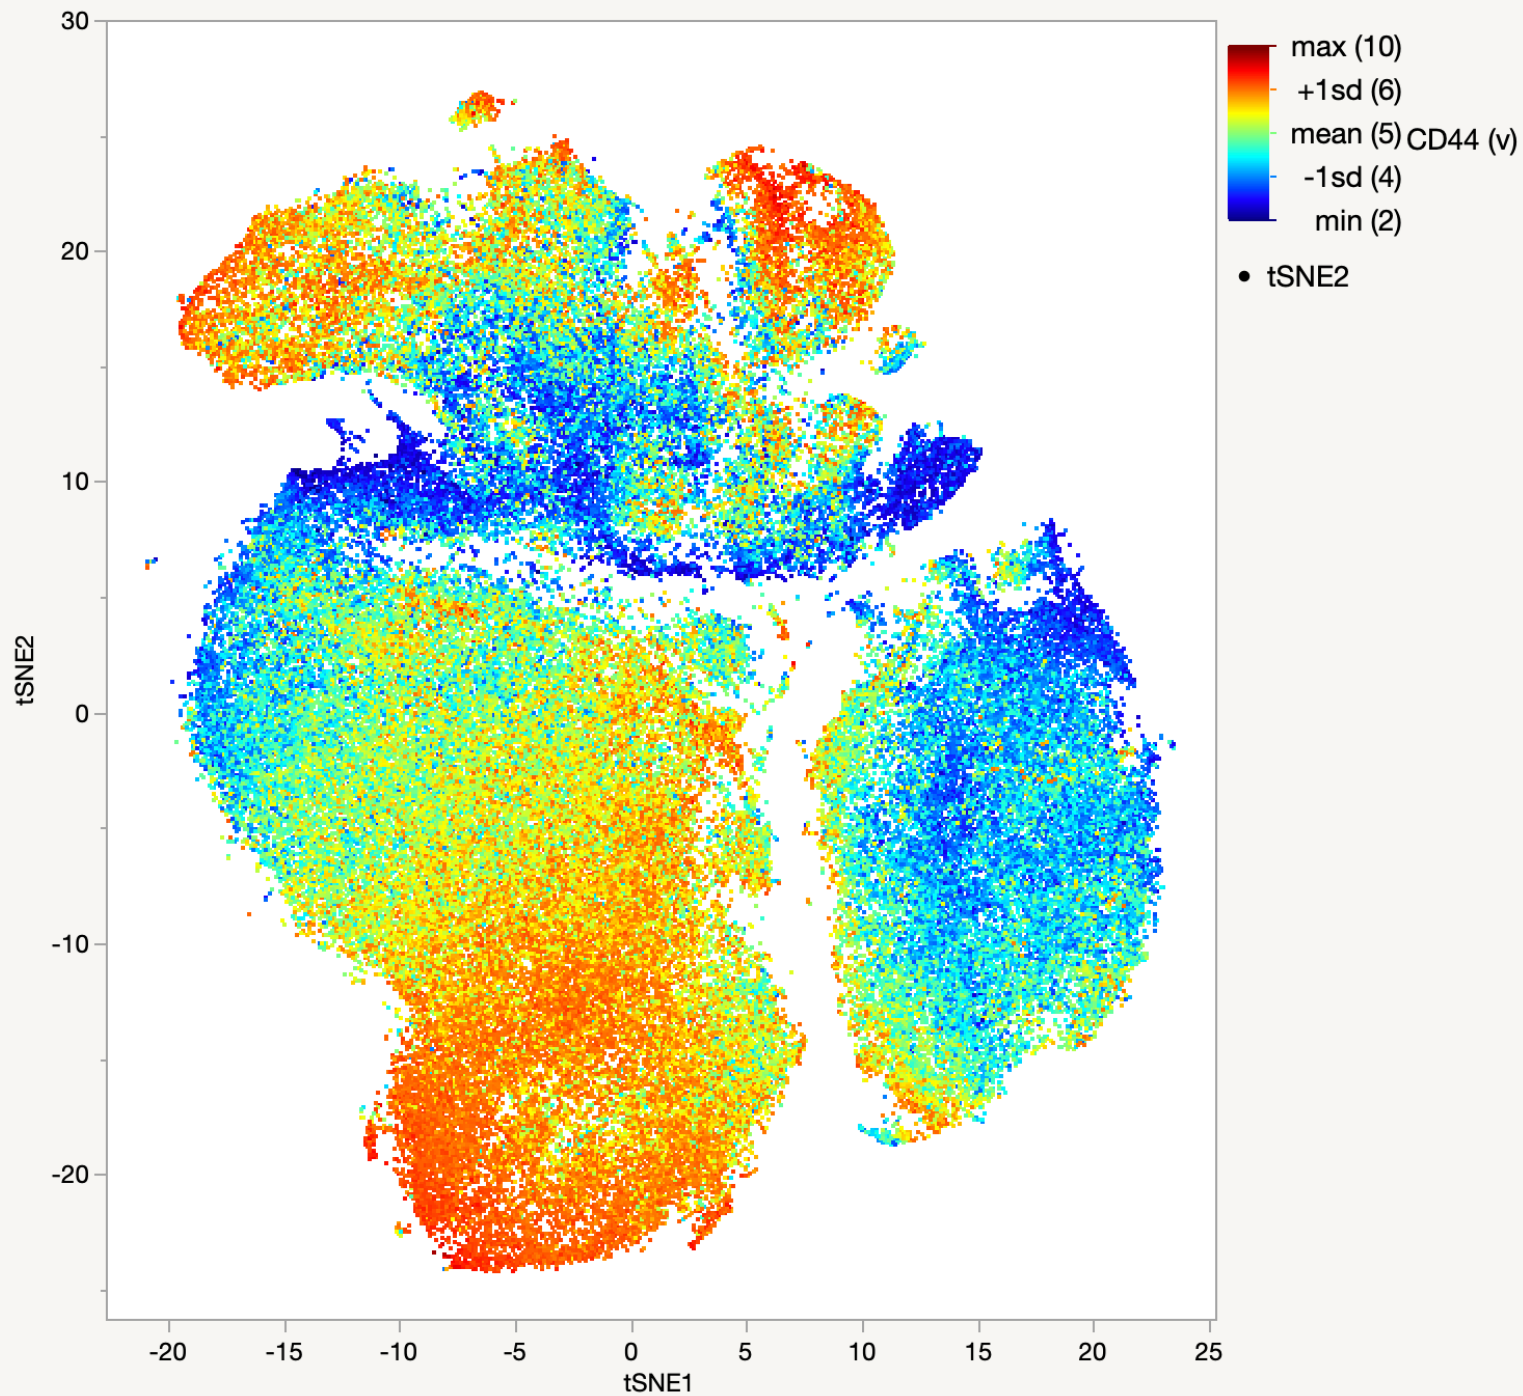

# Cl-Casp3

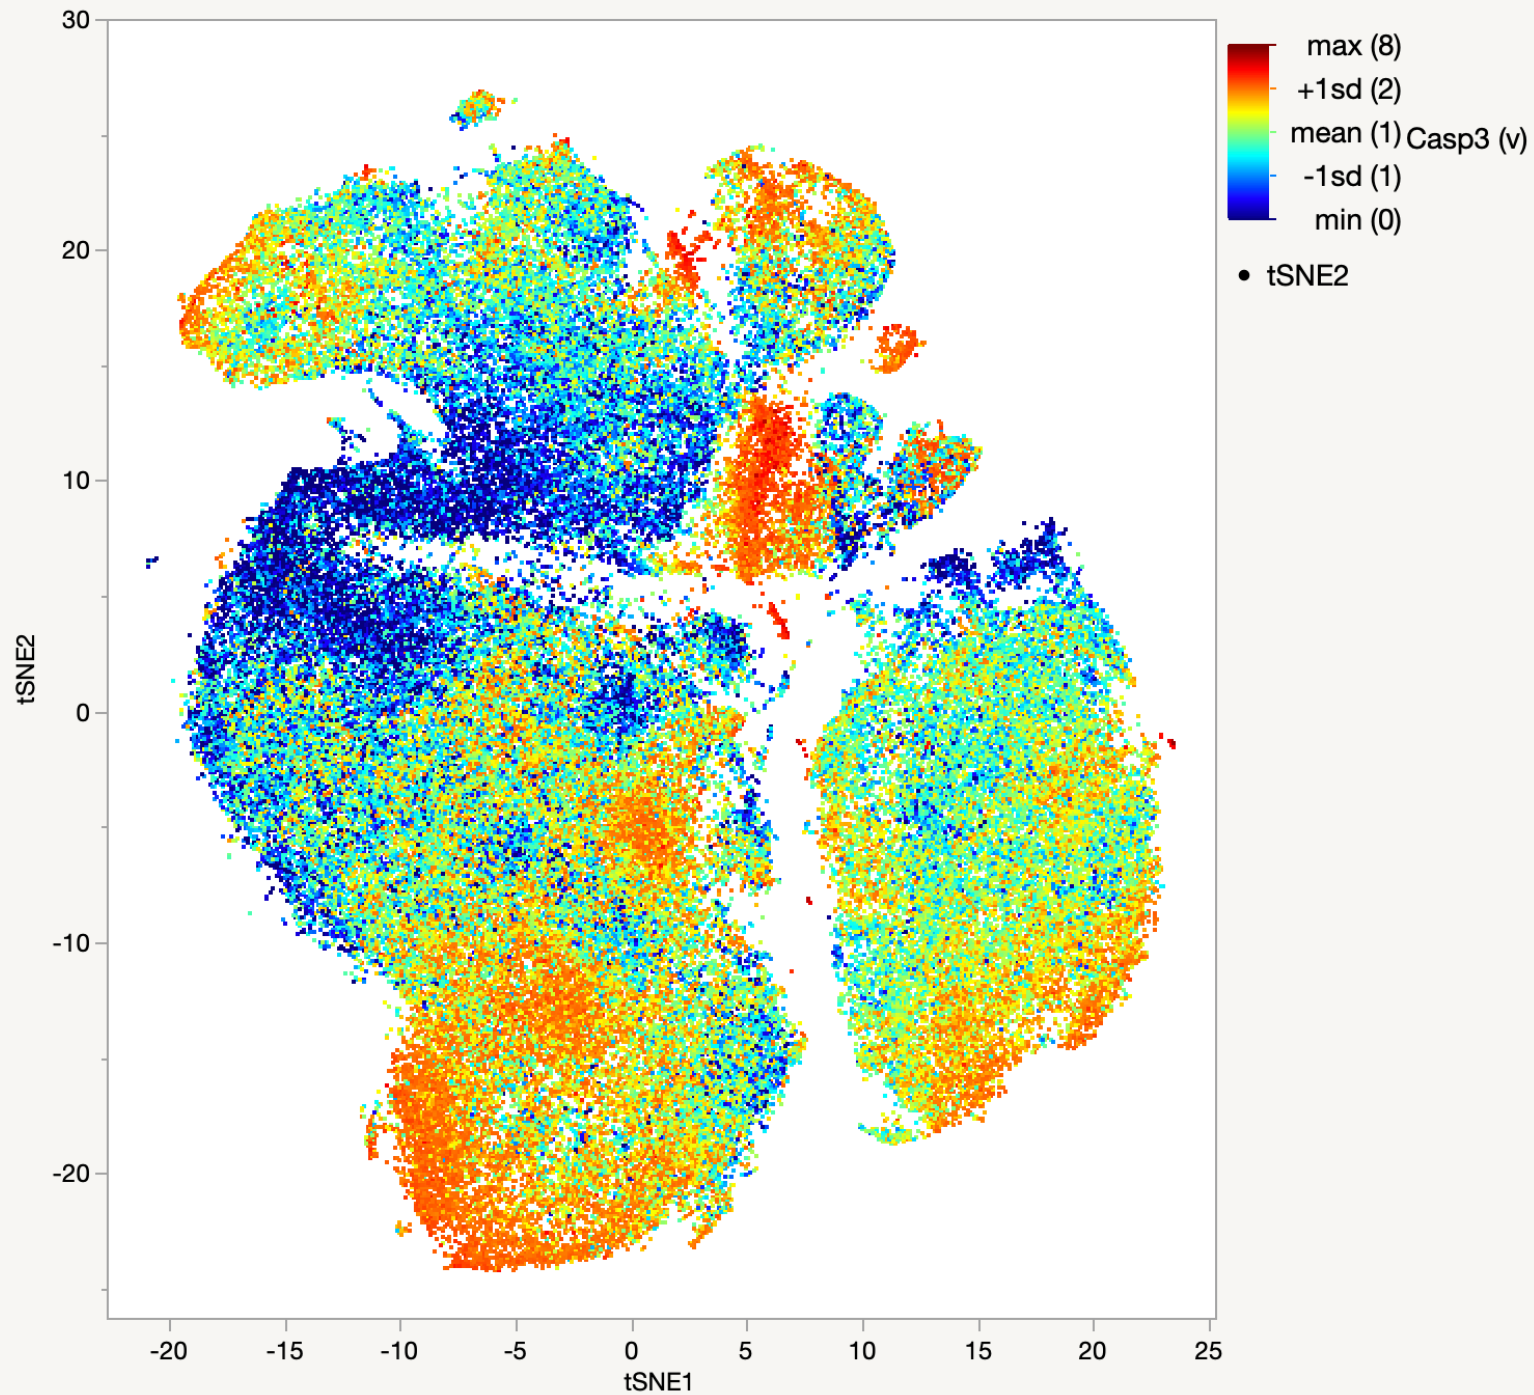

Supplement: NIHMS1774770-supplement-3.pdf [file NIHMS1774770-supplement-3.pdf]
