# Supplementary material
Source: PubMed Central journal article supplement (PMC8930560)
Supplement: NIHMS1774770-supplement-2.pdf [file NIHMS1774770-supplement-2.pdf]

**SUPPLEMENTARY TABLE 1: Mass cytometry antibody cocktail.**

| <u>Mass</u> | <u>Metal</u> | <u>Epitope</u>   | <u>Clone</u> | <u>Concentration</u> |       | <u>Vendor</u>  |
|-------------|--------------|------------------|--------------|----------------------|-------|----------------|
| 141         | Pr           | EpCAM            | EBA-1        | 0.5                  | µg/ml | BD             |
| 142         | Nd           | Casp3 (cleaved)  | D3E9         | 0.5                  | %     | Fluidigm       |
| 143         | Nd           | β-cat (active)   | D2U8Y        | 0.25                 | µg/ml | Cell Signaling |
| 145         | Nd           | EGFR             | D38B1        | 0.2                  | µg/ml | Cell Signaling |
| 146         | Nd           | IgG              | DA1E         | 0.1                  | µg/ml | Cell Signaling |
| 147         | Sm           | HER3             | D22C5        | 0.25                 | µg/ml | Cell Signaling |
| 148         | Nd           | HER2             | 29D8         | 0.25                 | µg/ml | Cell Signaling |
| 149         | Sm           | p4EBP1 (T37/46)  | 236B4        | 0.25                 | %     | Fluidigm       |
| 150         | Nd           | pStat5 (Y694)    | 47           | 1                    | %     | Fluidigm       |
| 151         | Eu           | c-Met            | D1C2         | 0.2                  | µg/ml | Cell Signaling |
| 152         | Sm           | pAkt (S473)      | D9E          | 1                    | %     | Fluidigm       |
| 153         | Eu           | pStat1 (Y701)    | 58D6         | 0.25                 | µg/ml | Cell Signaling |
| 154         | Sm           | pAkt (T308)      | D25E6        | 0.25                 | µg/ml | Cell Signaling |
| 156         | Gd           | p-p38            | D3F9         | 0.5                  | %     | Fluidigm       |
| 158         | Gd           | pStat3 (Y705)    | Y705         | 1                    | %     | Fluidigm       |
| 159         | Tb           | c-Myc            | D3N8F        | 0.25                 | µg/ml | Cell Signaling |
| 160         | Dy           | m-CD45           | 30-F11       | 0.05                 | µg/ml | Biologend      |
| 162         | Dy           | pJnk (T183/Y185) | G9           | 0.3                  | µg/ml | Cell Signaling |
| 164         | Dy           | p-p90RSK (S380)  | D5D8         | 0.25                 | µg/ml | Cell Signaling |
| 166         | Er           | CD44             | IM7          | 0.05                 | µg/ml | Biologend      |
| 168         | Er           | Ki-67            | B56          | 0.5                  | %     | Fluidigm       |
| 169         | Tm           | GFP              | 5F12.4       | 0.5                  | %     | Fluidigm       |
| 170         | Er           | IGF1R-B          | D23H3        | 0.3                  | µg/ml | Cell Signaling |
| 171         | Yb           | pErk (T202/Y204) | D13.14.4E    | 0.5                  | µg/ml | Cell Signaling |
| 172         | Yb           | pS6 (S235/236)   | N7-548       | 0.25                 | %     | Fluidigm       |
| 175         | Lu           | CK 5, 8, 18      | RCK102, C-04 | 0.025                | µg/ml | Abcam          |

SUPPLEMENTARY TABLE 2: Antibody signal spillover table

| ANTIBODY | CHANNEL |       |       |       |       |       |       |       |       |       |       |       |       |       |       |       |       |       |       |       |       |       |       |       |       |       |       |       |       |       |       |       |       |       |       |       |   |
|----------|---------|-------|-------|-------|-------|-------|-------|-------|-------|-------|-------|-------|-------|-------|-------|-------|-------|-------|-------|-------|-------|-------|-------|-------|-------|-------|-------|-------|-------|-------|-------|-------|-------|-------|-------|-------|---|
|          | Pr141   | Nd142 | Nd143 | Nd144 | Nd145 | Nd146 | Sm147 | Nd148 | Sm149 | Nd150 | Eu151 | Sm152 | Eu153 | Sm154 | Gd155 | Gd156 | Gd158 | Tb159 | Dy160 | Dy161 | Dy162 | Dy163 | Dy164 | Ho165 | Er166 | Er167 | Er168 | Tm169 | Er170 | Yb171 | Yb172 | Yb174 | Lu175 | Yb176 |       |       |   |
| EpCAM    | 1       | 0.001 | 0     | 0     | 0.005 | 0.001 | 0     | 0     | 0     | 0     | 0     | 0     | 0     | 0     | 0     | 0     | 0     | 0     | 0     | 0     | 0     | 0     | 0     | 0     | 0     | 0     | 0     | 0     | 0     | 0     | 0     | 0     | 0     | 0     | 0     | 0     |   |
| Cl-Casp3 | 0       | 1     | 0.004 | 0     | 0     | 0     | 0     | 0     | 0     | 0     | 0     | 0     | 0     | 0     | 0     | 0     | 0.014 | 0     | 0     | 0     | 0     | 0     | 0     | 0     | 0     | 0     | 0     | 0     | 0     | 0     | 0     | 0     | 0     | 0     | 0     | 0     |   |
| β-Cat    | 0       | 0.008 | 1     | 0.021 | 0.001 | 8E-04 | 0     | 0     | 0     | 0     | 0     | 0     | 0     | 0     | 0     | 0     | 0     | 0.012 | 0     | 0     | 0     | 0     | 0     | 0     | 0     | 0     | 0     | 0     | 0     | 0     | 0     | 0     | 0     | 0     | 0     | 0     |   |
| EGFR     | 0       | 0.003 | 0.002 | 0.011 | 1     | 0.036 | 0     | 0     | 0     | 0     | 0     | 0     | 0     | 0     | 0     | 0     | 0     | 0     | 0     | 0.015 | 0     | 0     | 0     | 0     | 0     | 0     | 0     | 0     | 0     | 0     | 0     | 0     | 0     | 0     | 0     | 0     |   |
| HER3     | 0       | 0     | 0     | 2E-04 | 0     | 0     | 1     | 0.023 | 0.004 | 0     | 0     | 0.002 | 0     | 0.002 | 0     | 0     | 0     | 0     | 0     | 0     | 0     | 0     | 0.003 | 0     | 0     | 0     | 0     | 0     | 0     | 0     | 0     | 0     | 0     | 0     | 0     | 0     |   |
| HER2     | 0       | 0.004 | 0.001 | 0.003 | 3E-04 | 0.004 | 0     | 1     | 0     | 0.003 | 0     | 0     | 0     | 0     | 0     | 0     | 0     | 0     | 0     | 0     | 0     | 0     | 0     | 0.014 | 0     | 0     | 0     | 0     | 0     | 0     | 0     | 0     | 0     | 0     | 0     | 0     |   |
| p4EBP1   | 0       | 0     | 0     | 0     | 0     | 0     | 6E-04 | 0.007 | 1     | 0.015 | 2E-04 | 0.004 | 0     | 0.003 | 0     | 0     | 0     | 0     | 0     | 0     | 0     | 0     | 0     | 0     | 0.003 | 0     | 0     | 0     | 0     | 0     | 0     | 0     | 0     | 0     | 0     | 0     |   |
| pStat5   | 0       | 0.003 | 0.001 | 0.004 | 0     | 0.002 | 0     | 0.001 | 0     | 1     | 0     | 0     | 0     | 0     | 0     | 0     | 0     | 0     | 0     | 0     | 0     | 0     | 0     | 0     | 0.011 | 0     | 0     | 0     | 0     | 0     | 0     | 0     | 0     | 0     | 0     | 0     |   |
| c-Met    | 0       | 0     | 0     | 0     | 0     | 0     | 0     | 0     | 0     | 0     | 1     | 5E-04 | 0.008 | 0     | 0     | 0     | 0     | 0     | 0     | 0     | 0     | 0     | 0     | 0     | 0     | 0     | 0     | 0     | 0     | 0     | 0     | 0     | 0     | 0     | 0     | 0     |   |
| pAkt473  | 0       | 0     | 0     | 0     | 0     | 0     | 0     | 0     | 0     | 0     | 0     | 1     | 0     | 0.005 | 0     | 0     | 0     | 0     | 0     | 0     | 0     | 0     | 0     | 0     | 0     | 0     | 0     | 0     | 0     | 0     | 0     | 0     | 0     | 0     | 0     | 0     |   |
| pStat1   | 0       | 0     | 0     | 0     | 0     | 0     | 0     | 0     | 0     | 0     | 0.006 | 0     | 1     | 1E-03 | 0     | 0     | 0     | 0     | 0     | 0     | 0     | 0     | 0     | 0     | 0     | 0     | 0     | 0     | 0     | 0     | 0     | 0     | 0     | 0     | 0     | 0     |   |
| pAkt308  | 0       | 0     | 0     | 0     | 0     | 0     | 1E-04 | 0     | 1E-04 | 0     | 0     | 0.006 | 0     | 1     | 6E-04 | 0.001 | 0     | 0     | 0     | 0     | 0     | 0     | 0     | 0     | 0     | 0     | 0     | 0     | 0     | 0.001 | 0     | 0     | 0     | 0     | 0     | 0     | 0 |
| pStat3   | 0       | 0     | 0     | 0     | 0     | 0     | 0     | 0     | 0     | 0     | 0     | 0     | 0     | 0     | 4E-06 | 0.001 | 1     | 0.002 | 0.006 | 0     | 0     | 0     | 0     | 0     | 0     | 0     | 0     | 0     | 0     | 0     | 0     | 0     | 0     | 0.002 | 0     | 0     |   |
| c-Myc    | 0       | 0     | 0     | 0     | 0     | 0     | 0     | 0     | 0     | 0     | 0     | 0     | 0     | 0     | 0     | 0     | 0     | 1     | 0.007 | 3E-04 | 0     | 0     | 0     | 0     | 4E-06 | 0     | 0     | 0     | 0     | 0     | 0     | 0     | 0     | 0     | 0     | 0     | 0 |
| m-CD45   | 0       | 0     | 0     | 0     | 0     | 0     | 0     | 0     | 0     | 0     | 0     | 0     | 0     | 0     | 0     | 0.005 | 0     | 1     | 0     | 0     | 0     | 0     | 0     | 0     | 0     | 0     | 0     | 0     | 0     | 0     | 0     | 0     | 0     | 0     | 0     | 0.002 |   |
| pJnk     | 0       | 0     | 0     | 0     | 0     | 0     | 0     | 0     | 0     | 0     | 0     | 0     | 0     | 0     | 0     | 0     | 0     | 0     | 2E-04 | 0.015 | 1     | 0.045 | 0.007 | 0     | 0     | 0     | 0     | 0     | 0     | 0     | 0     | 0     | 0     | 0     | 0     | 0     |   |
| p-p90RSK | 0       | 0     | 0     | 0     | 0     | 0     | 0     | 0     | 0     | 0     | 0     | 0     | 0     | 0     | 0     | 0     | 0     | 0     | 3E-04 | 0.001 | 0.01  | 1     | 0.001 | 0     | 0     | 0     | 0     | 1E-04 | 5E-05 | 0     | 0     | 0     | 0     | 0     | 0     |       |   |
| GFP      | 0       | 0     | 0     | 0     | 0     | 0     | 0     | 0     | 0     | 0     | 0     | 0     | 0     | 0     | 0     | 0     | 0     | 0     | 0     | 0     | 0     | 0     | 0     | 0     | 0     | 0     | 2E-04 | 1     | 0.003 | 5E-05 | 0.002 | 3E-04 | 1E-04 | 0     | 0     | 0     |   |
| IGF1R    | 0       | 0     | 0     | 0     | 0     | 0     | 0     | 0     | 0     | 0     | 0     | 0     | 0     | 0     | 0     | 0     | 0     | 0     | 0     | 0     | 0     | 0     | 0     | 0     | 0     | 0.004 | 0.003 | 0.006 | 4E-05 | 1     | 0.003 | 3E-04 | 0     | 4E-04 | 0     | 0     |   |
| pErk     | 0       | 0     | 0     | 0     | 0     | 0     | 0     | 0     | 0     | 0     | 0     | 0     | 0     | 0     | 0     | 0     | 0     | 0     | 0     | 0     | 0     | 0     | 0     | 0     | 0     | 0     | 0     | 0.001 | 1     | 0.037 | 0.002 | 0.01  | 0     | 6E-04 | 0     | 3E-04 |   |
| pS6      | 0       | 0     | 0     | 0     | 0     | 0     | 0     | 0     | 0     | 0     | 0     | 0     | 0     | 0     | 0     | 0     | 0     | 0     | 0     | 0     | 0     | 0     | 0     | 0     | 0     | 0     | 0     | 0     | 0     | 0     | 0.008 | 1     | 0.01  | 0     | 6E-04 | 0     |   |
| CK       | 0       | 0     | 0     | 0     | 0     | 0     | 0     | 0     | 0     | 0     | 0     | 0     | 0     | 0     | 0     | 0     | 0     | 0     | 0     | 0     | 0     | 0     | 0     | 0     | 0     | 0     | 0     | 0     | 0     | 0     | 0     | 0     | 0     | 6E-04 | 0     | 1     |   |

**SUPPLEMENTARY TABLE 3: Cell number statistics for mass cytometry datasets**

| <b>Model</b> | <b>Sample Set</b> | <b>Mean Cell Number</b> | <b>Median Cell Number</b> | <b>Min Cell Number</b> | <b>Max Cell Number</b> | <b>Std Dev Cell Number</b> |
|--------------|-------------------|-------------------------|---------------------------|------------------------|------------------------|----------------------------|
| PC3          | Primary           | 8998                    | 2581                      | 148                    | 49619                  | 16015.3                    |
| PC3          | CTC               | 89                      | 44                        | 15                     | 314                    | 100.4                      |
| PC3          | Lung              | 1236                    | 321                       | 47                     | 3985                   | 1544.4                     |
| PC3          | Liver             | 2974                    | 1324                      | 52                     | 16806                  | 5653.4                     |
| PC3          | Bone              | 7652                    | 5134                      | 141                    | 17680                  | 9036.5                     |
|              |                   |                         |                           |                        |                        |                            |
| CE1-4        | Primary           | 33427                   | 32310                     | 20304                  | 50948                  | 10464.7                    |
| CE1-4        | CTC               | 8                       | 10                        | 4                      | 11                     | 3.8                        |
| CE1-4        | Lung              | 141                     | 165                       | 12                     | 247                    | 119.3                      |
| CE1-4        | Liver             | 153                     | 128                       | 17                     | 338                    | 150.5                      |
| CE1-4        | Bone              | 5681                    | 4998                      | 20                     | 12709                  | 5855.5                     |

**SUPPLEMENTARY TABLE 4: Patient survival data for breast cancer dataset 2**

|                         | Patient | OS days | OS event | TTP days | TTP event |
|-------------------------|---------|---------|----------|----------|-----------|
| BR21_1_SC1_052113       | BR21    | 220     | 1        | 43       | 1         |
| BR21_1_SC2_052113       | BR21    | 220     | 1        | 43       | 1         |
| BR21_1_SC3_052113       | BR21    | 220     | 1        | 43       | 1         |
| BR29_1_012913           | BR29    | 999     | 0        | 408      | 0         |
| BR29_2_012913           | BR29    | 999     | 0        | 408      | 0         |
| BR29_3_BYL_012913       | BR29    | 998     | 0        | 407      | 0         |
| BrTr08_1_CL1_012913     | BrTr08  | 28      | 0        | 28       | 0         |
| BrTr08_1_CL2_012913     | BrTr08  | 28      | 0        | 28       | 0         |
| BrTr11_1_CL1_022513     | BrTr11  | 125     | 1        | 71       | 1         |
| BrTr11_1_CL2_022513     | BrTr11  | 125     | 1        | 71       | 1         |
| BrTr11_1_CL3_022513     | BrTr11  | 125     | 1        | 71       | 1         |
| BrTr11_1_SC2_022513     | BrTr11  | 125     | 1        | 71       | 1         |
| BrTr12_SC_022813        | BrTr12  | NA      | NA       | NA       | NA        |
| Brx03_CL1_012913        | Brx03   | NA      | NA       | NA       | NA        |
| Brx10_1_SC1_041113      | Brx10   | 621     | 1        | 29       | 1         |
| Brx10_1_SC2_041113      | Brx10   | 621     | 1        | 29       | 1         |
| Brx10_1_SC3_041113      | Brx10   | 621     | 1        | 29       | 1         |
| Brx100_1_SC3_080113     | Brx100  | 98      | 0        | 98       | 0         |
| Brx100_1_SC4_080113     | Brx100  | 98      | 0        | 98       | 0         |
| Brx100_1_SC5_080113     | Brx100  | 98      | 0        | 98       | 0         |
| Brx100_2_BYL_SC2_080213 | Brx100  | 97      | 0        | 97       | 0         |
| Brx107_1_SC2_092013     | Brx107  | 754     | 0        | 645      | 1         |
| Brx107_1_SC1_092013     | Brx107  | 754     | 0        | 645      | 1         |
| Brx109_1_SC1_121613     | Brx109  | 92      | 1        | 64       | 0         |
| Brx109_1_CL1_121613     | Brx109  | 92      | 1        | 64       | 0         |
| Brx11_CL_020413         | Brx11   | NA      | NA       | NA       | NA        |
| Brx11_SC_020413         | Brx11   | NA      | NA       | NA       | NA        |
| Brx116_1_SC1_120213     | Brx116  | 637     | 0        | 275      | 1         |
| Brx116_1_SC3_120213     | Brx116  | 637     | 0        | 275      | 1         |
| Brx116_2_SC1_120213     | Brx116  | 637     | 0        | 275      | 1         |
| Brx116_1_SC1_092414     | Brx116  | 342     | 0        | 98       | 0         |
| Brx116_2_TX_SC1_092414  | Brx116  | 342     | 0        | 98       | 0         |
| Brx117_1_SC1_120613     | Brx117  | 501     | 0        | 223      | 1         |
| Brx117_1_SC2_120613     | Brx117  | 501     | 0        | 223      | 1         |
| Brx117_2_SC1_091814     | Brx117  | 216     | 0        | 232      | 1         |
| Brx12_SC_012913         | Brx12   | NA      | NA       | NA       | NA        |
| Brx120_1_SC2_120513     | Brx120  | NA      | NA       | 208      | 1         |
| Brx120_1_SC3_120513     | Brx120  | NA      | NA       | 208      | 1         |
| Brx120_2_BYL_SC1_120613 | Brx120  | NA      | NA       | 207      | 1         |
| Brx121_1_SC1_120913     | Brx121  | 651     | 0        | 447      | 1         |
| Brx121_1_SC2_120913     | Brx121  | 651     | 0        | 447      | 1         |
| Brx121_1_SC3_120913     | Brx121  | 651     | 0        | 447      | 1         |
| Brx122_1_SC1_121213     | Brx122  | 636     | 0        | 165      | 1         |

|                             |        |      |    |      |    |
|-----------------------------|--------|------|----|------|----|
| Brx122_1_SC2_121213         | Brx122 | 636  | 0  | 165  | 1  |
| Brx122_1_SC3_121213         | Brx122 | 636  | 0  | 165  | 1  |
| Brx126_1_SC3_021214         | Brx126 | 615  | 0  | 62   | 1  |
| Brx130_1_SC1_011714         | Brx130 | 83   | 0  | 83   | 0  |
| Brx130_1_SC2_011714         | Brx130 | 83   | 0  | 83   | 0  |
| Brx134_1_SC1_021914         | Brx134 | 593  | 0  | 53   | 1  |
| Brx134_1_SC2_021914         | Brx134 | 593  | 0  | 53   | 1  |
| Brx146_2_relapse_SC1_082114 | Brx146 | NA   | NA | NA   | NA |
| Brx146_2_relapse_SC2_082114 | Brx146 | NA   | NA | NA   | NA |
| Brx146_2_relapse_SC3_082114 | Brx146 | NA   | NA | NA   | NA |
| Brx163_1_SC2_090814         | Brx163 | NA   | NA | 175  | 1  |
| Brx163_1_SC3_090814         | Brx163 | NA   | NA | 175  | 1  |
| Brx163_1_SC4_090814         | Brx163 | NA   | NA | 175  | 1  |
| Brx164_1_SC1_091814         | Brx164 | 395  | 1  | 372  | 1  |
| Brx164_1_SC2_091814         | Brx164 | 395  | 1  | 372  | 1  |
| Brx164_1_SC3_091814         | Brx164 | 395  | 1  | 372  | 1  |
| Brx164_1_SC4_091814         | Brx164 | 395  | 1  | 372  | 1  |
| Brx17_SC1_020713            | Brx17  | NA   | NA | NA   | NA |
| Brx17_CL2_020713            | Brx17  | NA   | NA | NA   | NA |
| Brx35_1_SC1_091213          | Brx35  | 567  | 1  | 56   | 1  |
| Brx35_1_SC2_110713          | Brx35  | 510  | 1  | 119  | 1  |
| Brx50_2_031113              | Brx50  | 31   | 1  | 8    | 1  |
| Brx52_CL1_020413            | Brx52  | NA   | NA | NA   | NA |
| Brx52_CL2_020413            | Brx52  | NA   | NA | NA   | NA |
| Brx52_CL3_020413            | Brx52  | NA   | NA | NA   | NA |
| Brx52_CL4_020413            | Brx52  | NA   | NA | NA   | NA |
| Brx52_CL5_020413            | Brx52  | NA   | NA | NA   | NA |
| Brx52_SC1_020413            | Brx52  | NA   | NA | NA   | NA |
| Brx52_SC2_020413            | Brx52  | NA   | NA | NA   | NA |
| Brx53_CL2_010313            | Brx53  | 246  | 1  | 82   | 1  |
| Brx53_SC1_010313            | Brx53  | 246  | 1  | 82   | 1  |
| Brx53_CL1_011513            | Brx53  | 219  | 1  | 55   | 1  |
| Brx53_CL2_011513            | Brx53  | 219  | 1  | 55   | 1  |
| Brx53_SC_011513             | Brx53  | 219  | 1  | 55   | 1  |
| Brx61_1_CL1_032012          | Brx61  | NA   | NA | NA   | NA |
| Brx61_1_CL2_032012          | Brx61  | NA   | NA | NA   | NA |
| Brx61_1_CL3_032012          | Brx61  | NA   | NA | NA   | NA |
| Brx61_1_CL4_032012          | Brx61  | NA   | NA | NA   | NA |
| Brx61_1_CL5_032012          | Brx61  | NA   | NA | NA   | NA |
| Brx61_1_CL6_032012          | Brx61  | NA   | NA | NA   | NA |
| Brx61_1_SC1_032012          | Brx61  | NA   | NA | NA   | NA |
| Brx61_1_SC2_032012          | Brx61  | NA   | NA | NA   | NA |
| Brx61_1_SC4_032012          | Brx61  | NA   | NA | NA   | NA |
| Brx66_1_012913              | Brx66  | 1007 | 0  | 1007 | 0  |
| Brx66_2_CL1_012913          | Brx66  | 1007 | 0  | 1007 | 0  |
| Brx66_2_CL2_012913          | Brx66  | 1007 | 0  | 1007 | 0  |

|                               |       |      |    |      |    |
|-------------------------------|-------|------|----|------|----|
| Brx66_2_CL3_012913            | Brx66 | 1007 | 0  | 1007 | 0  |
| Brx66_2_SC1_012913            | Brx66 | 1007 | 0  | 1007 | 0  |
| Brx66_2_SC2_012913            | Brx66 | 1007 | 0  | 1007 | 0  |
| Brx70_2_BYLrelapse_SC1_092413 | Brx70 | NA   | NA | 128  | 1  |
| Brx71_SC1_031413              | Brx71 | 454  | 1  | 454  | 1  |
| Brx71_SC2_031413              | Brx71 | 454  | 1  | 454  | 1  |
| Brx72_1_SC1_031813            | Brx72 | NA   | NA | 67   | 1  |
| Brx72_1_SC2_031813            | Brx72 | NA   | NA | 67   | 1  |
| Brx72_1_SC3_031813            | Brx72 | NA   | NA | 67   | 1  |
| Brx72_1_SC4_031813            | Brx72 | NA   | NA | 67   | 1  |
| Brx72_1_SC5_031813            | Brx72 | NA   | NA | 67   | 1  |
| Brx72_1_SC6_031813            | Brx72 | NA   | NA | 67   | 1  |
| Brx72_2_BYL_SC1_031913        | Brx72 | NA   | NA | 66   | 1  |
| Brx72_2_BYL_SC2_031913        | Brx72 | NA   | NA | 66   | 1  |
| Brx72_2_BYL_SC3_031913        | Brx72 | NA   | NA | 66   | 1  |
| Brx73_1_SC1_032013            | Brx73 | 651  | 0  | 651  | 0  |
| Brx73_1_SC2_032013            | Brx73 | 651  | 0  | 651  | 0  |
| Brx74_1_SC2_032813            | Brx74 | 914  | 0  | 168  | 1  |
| Brx78_1_05102013              | Brx78 | 580  | 1  | 32   | 1  |
| Brx82_1_SC1_051613            | Brx82 | NA   | NA | 42   | 1  |
| Brx83_1_SC1_051613            | Brx83 | 568  | 1  | 154  | 1  |
| Brx83_1_SC2_051613            | Brx83 | 568  | 1  | 154  | 1  |
| Brx83_1_SC3_051613            | Brx83 | 568  | 1  | 154  | 1  |
| Brx83_1_SC4_051613            | Brx83 | 568  | 1  | 154  | 1  |
| Brx86_1_CL1_052313            | Brx86 | 99   | 1  | 14   | 1  |
| Brx86_1_SC2_052313            | Brx86 | 99   | 1  | 14   | 1  |
| Brx86_1_SC3_052313            | Brx86 | 99   | 1  | 14   | 1  |
| Brx86_2_BYL_SC1_052413        | Brx86 | 98   | 1  | 13   | 1  |
| Brx86_2_BYL_SC2_052413        | Brx86 | 98   | 1  | 13   | 1  |
| Brx86_2_BYL_SC3_052413        | Brx86 | 98   | 1  | 13   | 1  |
| Brx87_1_SC1_062113            | Brx87 | 485  | 1  | 0    | 0  |
| Brx87_1_SC2_062113            | Brx87 | 485  | 1  | 0    | 0  |
| Brx90_1_SC1_062713            | Brx90 | 596  | 0  | 42   | 0  |
| Brx90_1_SC1_101014            | Brx90 | 126  | 0  | 116  | 1  |
| Brx90_1_SC2_101014            | Brx90 | 126  | 0  | 116  | 1  |
| Brx90_1_SC3_101014            | Brx90 | 126  | 0  | 116  | 1  |
| Brx93_1_SC1_112113            | Brx93 | NA   | NA | NA   | NA |
| Brx95_1_SC1_071713            | Brx95 | 835  | 0  | 835  | 0  |
| Brx95_2_BYL_CL1_071813        | Brx95 | 834  | 0  | 834  | 0  |
| Brx97_1_SC1_072313            | Brx97 | 786  | 1  | 297  | 1  |
| Brx97_1_SC2_072313            | Brx97 | 786  | 1  | 297  | 1  |
| Brx97_1_SC3_072313            | Brx97 | 786  | 1  | 297  | 1  |
| Brx97_1_SC4_072313            | Brx97 | 786  | 1  | 297  | 1  |
| Brx97_1_SC5_072313            | Brx97 | 786  | 1  | 297  | 1  |
| Brx98_1_SC3_072313            | Brx98 | 755  | 0  | 464  | 1  |
| Brx98_1_SC5_072313            | Brx98 | 755  | 0  | 464  | 1  |
